# Supplementary material for: Efficient syntheses of alpha- and beta-C-nucleosides and the origin of anomeric selectivity
Source: Royal Society of Chemistry journal article supplement (doi:10.1039/c8qo00165k), 2018-01-01
Supplement: c8qo00165k2.pdf [file c8qo00165k2.pdf]

## SUPPORTING INFORMATION

### Efficient Syntheses of *alpha*- and *beta*-C-Nucleosides and the Origin of Anomeric Selectivity

Tongchao Liu,<sup>a,b,‡</sup> Zhengdan Zhu,<sup>b,c,e,‡</sup> Huanming Ren,<sup>b,d</sup> Yabin Chen,<sup>b</sup> Guohua Chen,<sup>d</sup> Maosheng Cheng,<sup>a</sup> Dongmei Zhao,<sup>a,\*</sup> Jingkang Shen<sup>b,e</sup>, Weiliang Zhu,<sup>b,c,e\*</sup> Bing Xiong<sup>b,e\*</sup> and Yue-Lei Chen<sup>b,e\*</sup>

<sup>a</sup> Key Laboratory of Structure-Based Drug Design and Discovery of Ministry of Education, Shenyang Pharmaceutical University, 103 Wenhua Lu, Shenyang 110016, P. R. China.

<sup>b</sup> State Key Laboratory of Drug Research, Shanghai Institute of Materia Medica, Chinese Academy of Sciences, 555 Zuchongzhi Road, Shanghai 201203; P. R. China.

<sup>c</sup> CAS Key Laboratory of Receptor Research, Drug Discovery and Design Center, Shanghai Institute of Materia Medica, Chinese Academy of Sciences, 555 Zuchongzhi Road, Shanghai 201203; P. R. China.

<sup>d</sup> School of Pharmacy, China Pharmaceutical University, 24 Tongjiaxiang, Nanjing 210009, P. R. China.

<sup>e</sup> University of Chinese Academy of Sciences, No.19A Yuquan Road, Beijing 100049, P. R. China.

<sup>†</sup> Dedicated to the memory of Professor Qi-Zhuo Wang (1922-2018).

<sup>‡</sup> T. L. and Z. Z. contributed equally to this work.

E-mail: D. Z.: [dongmeiz-67@163.com](mailto:dongmeiz-67@163.com); W.Z.: [wzhu@simmm.ac.cn](mailto:wzhu@simmm.ac.cn); B. X.: [bxiong@simmm.ac.cn](mailto:bxiong@simmm.ac.cn); Y.-L. C.: [chenyueleilei@gmail.com](mailto:chenyueleilei@gmail.com)

#### Table of Contents

|                          |      |
|--------------------------|------|
| 1. Copies of NMR spectra | 2-22 |
|--------------------------|------|

# Compound 12a

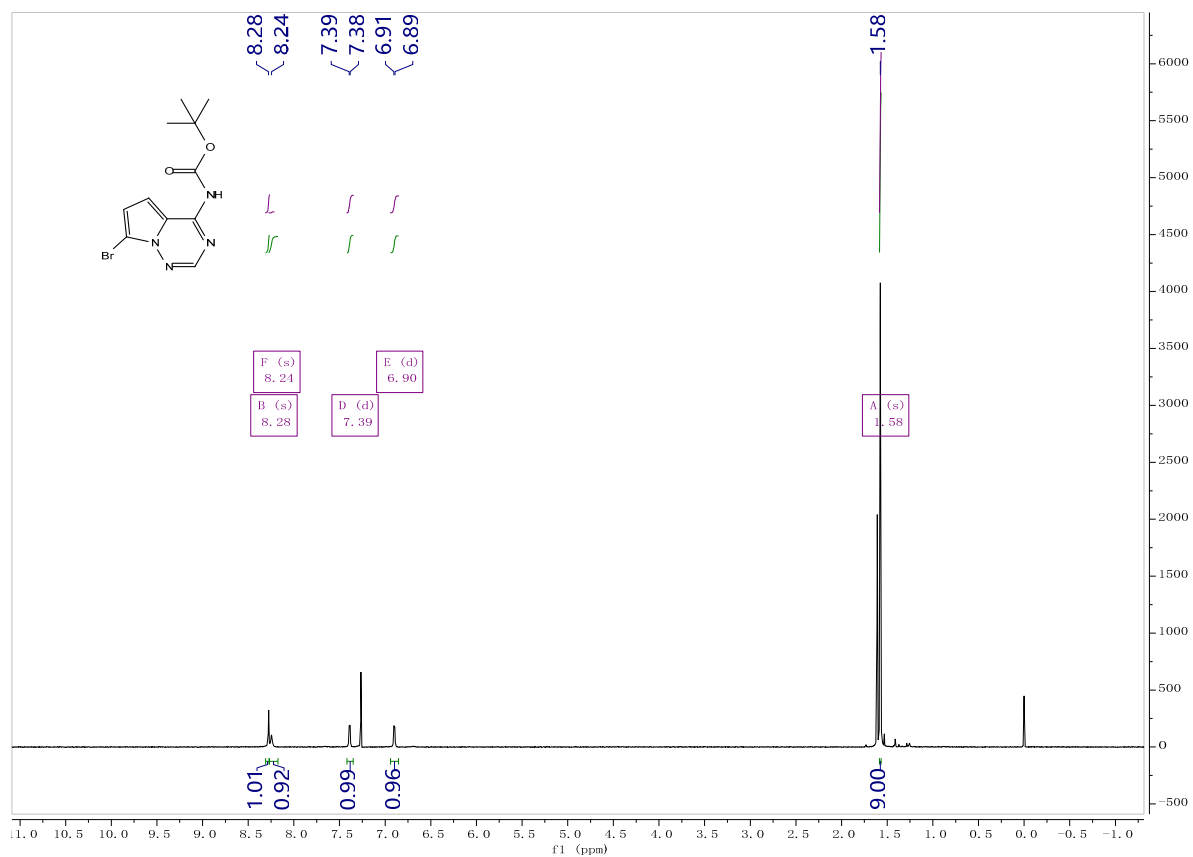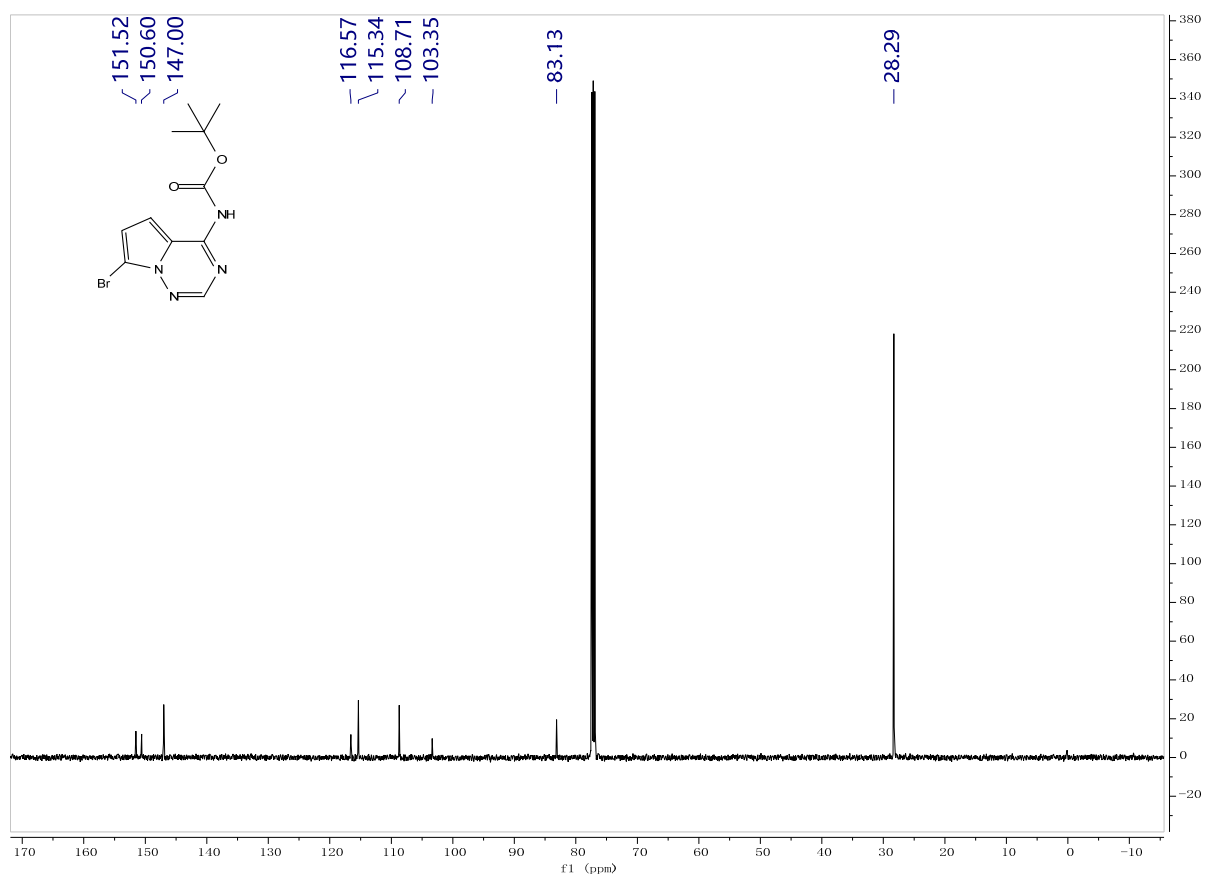

# Compound 12b

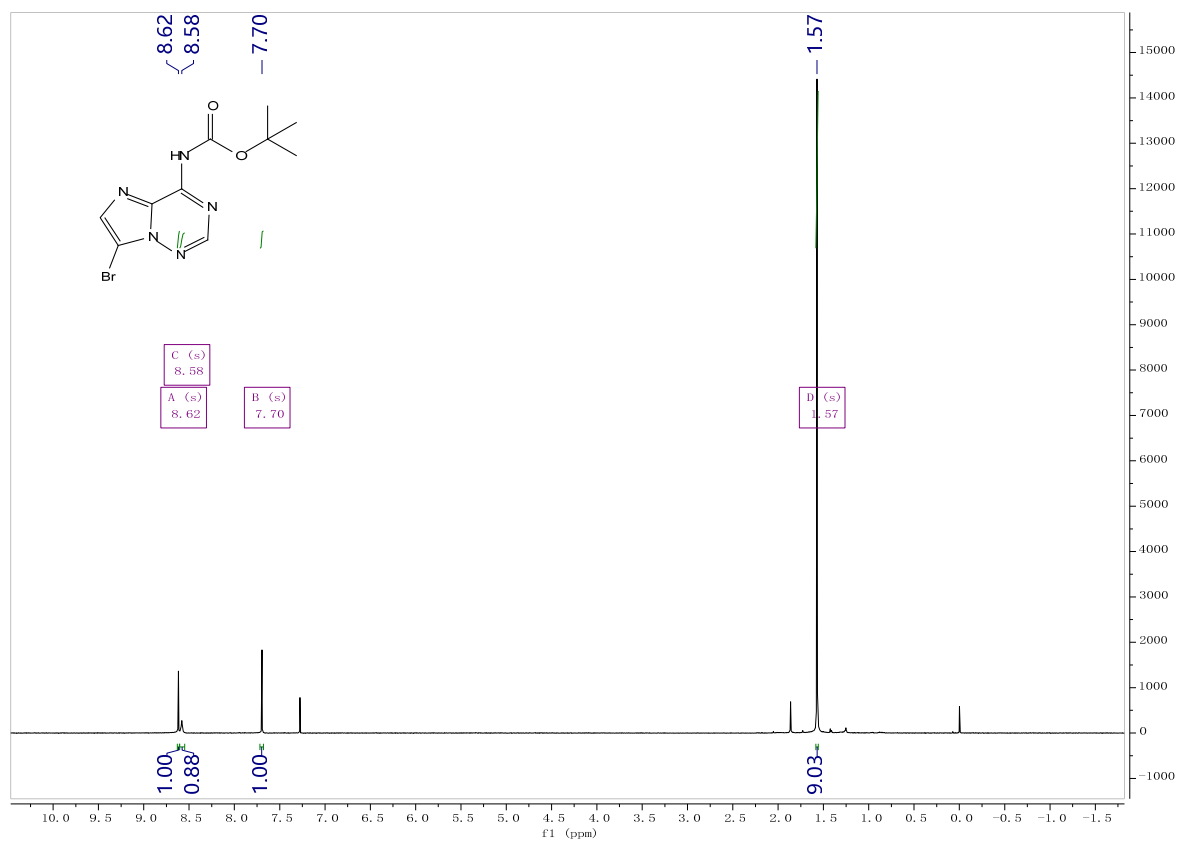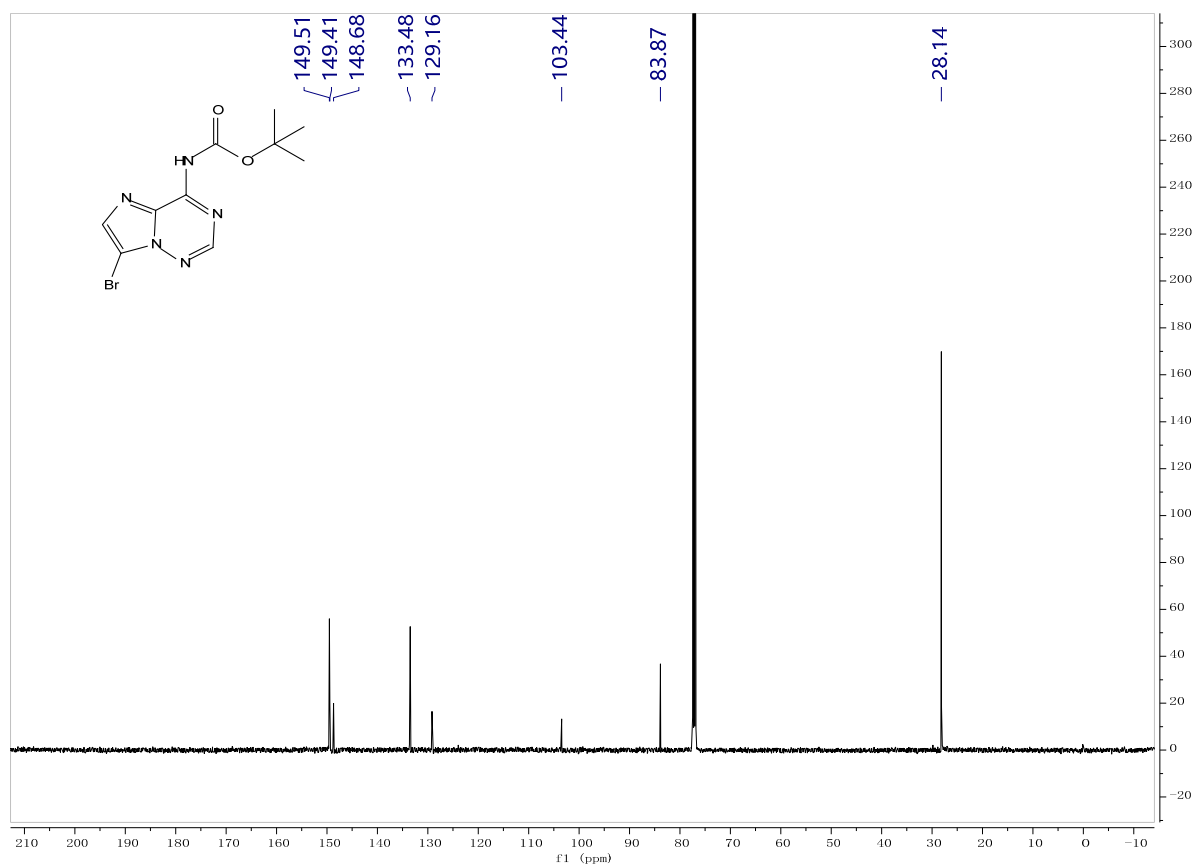

# Compound 16a

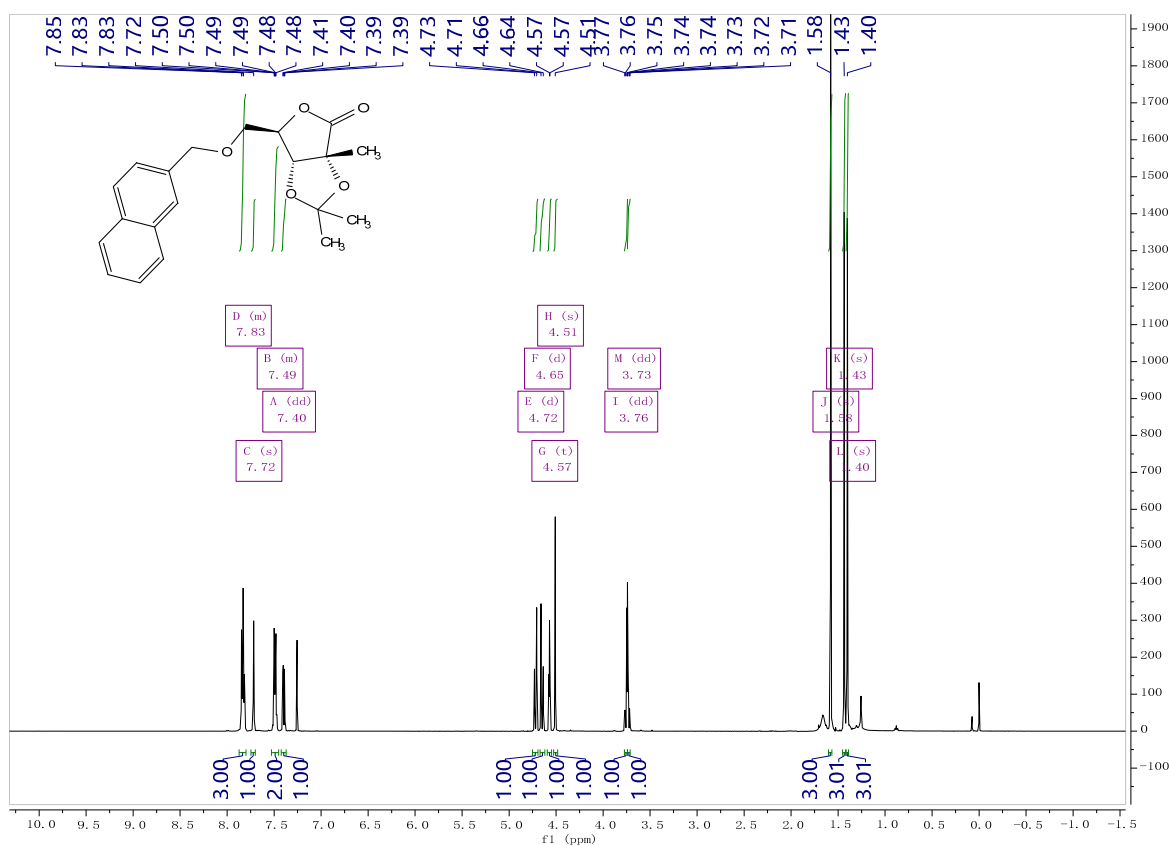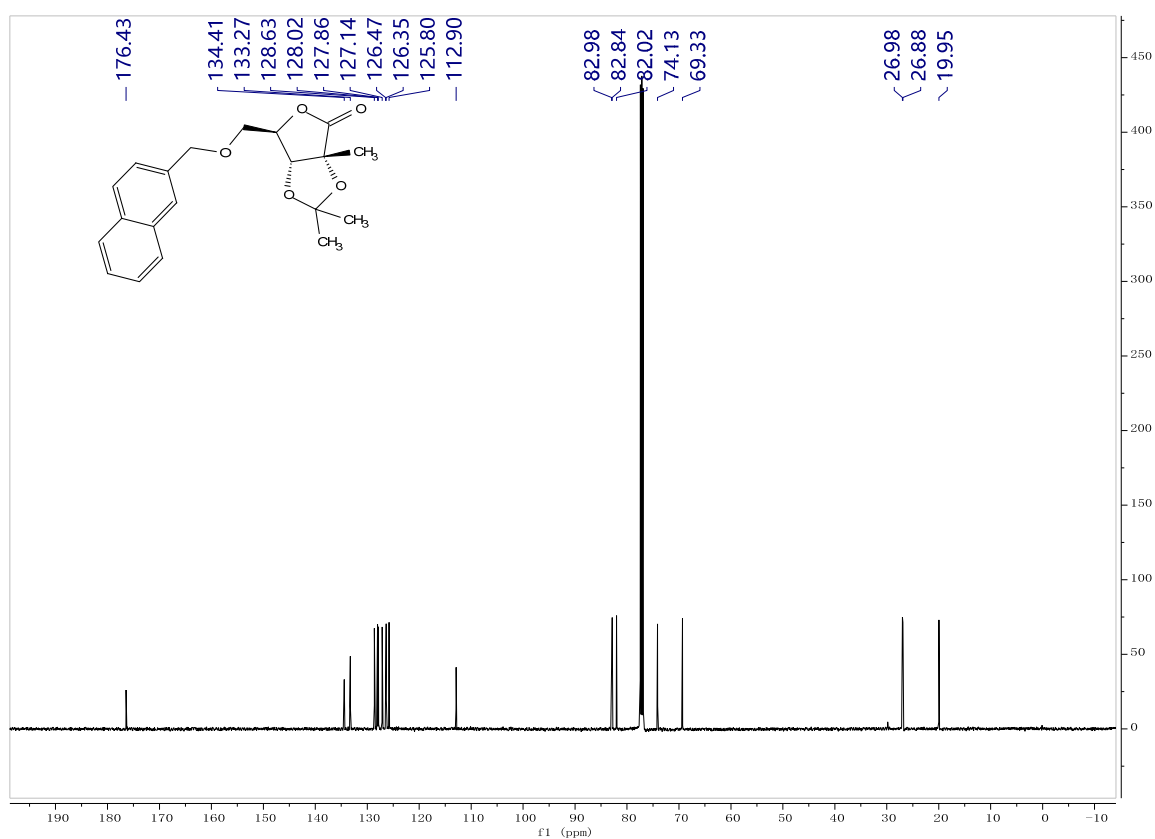

# Compound 16b

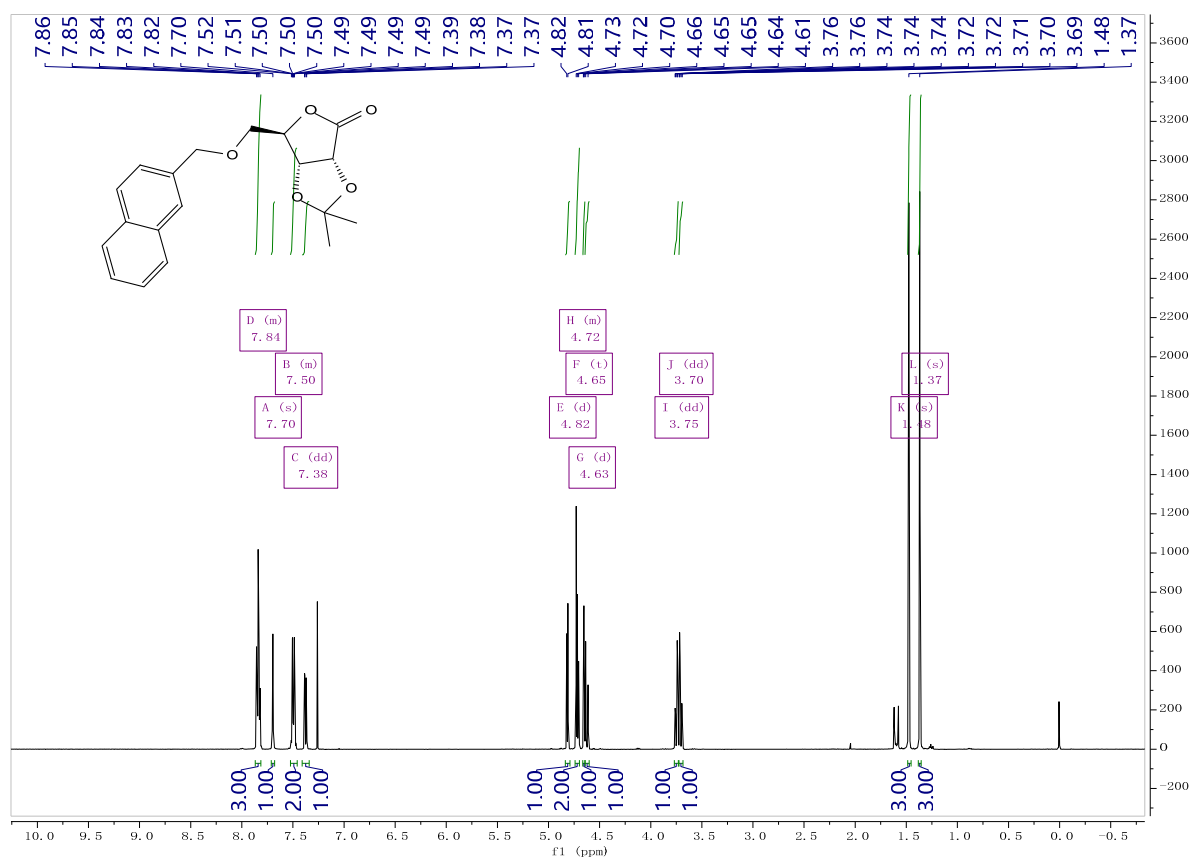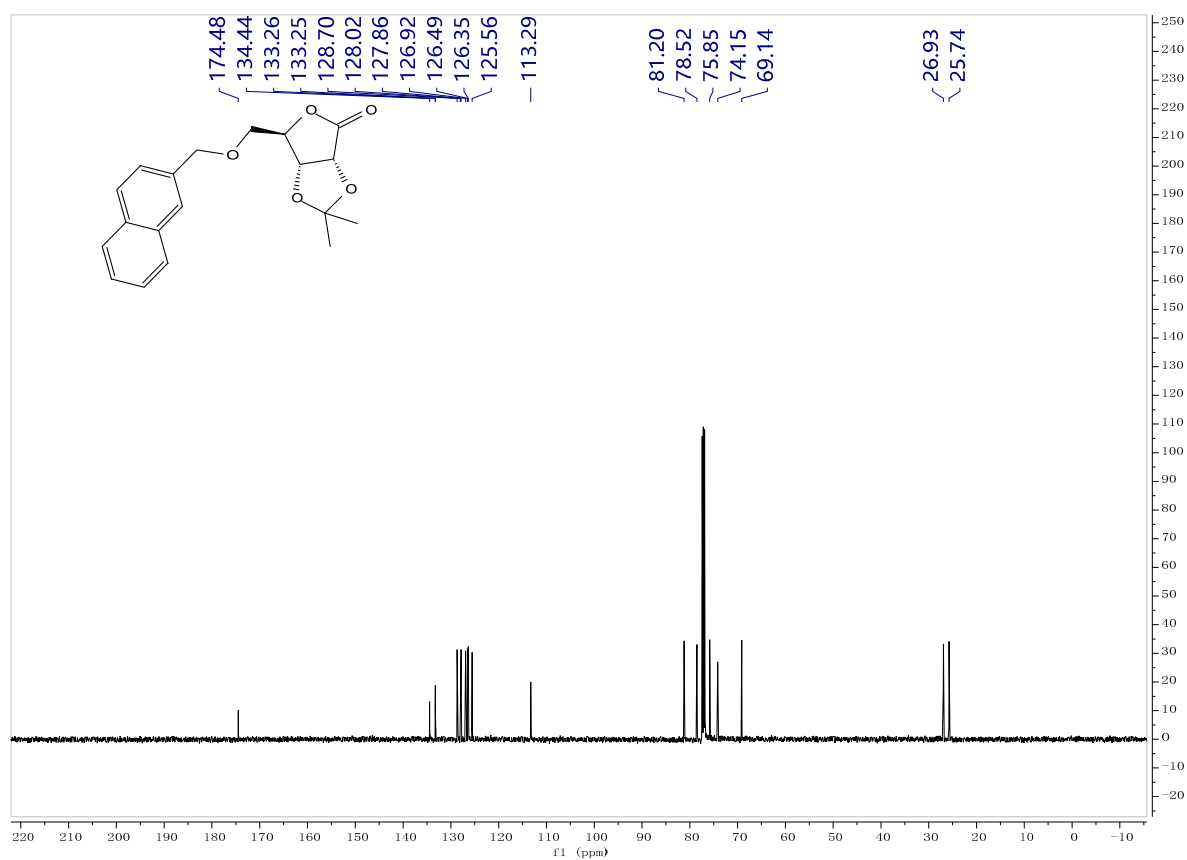

# Compound 21a

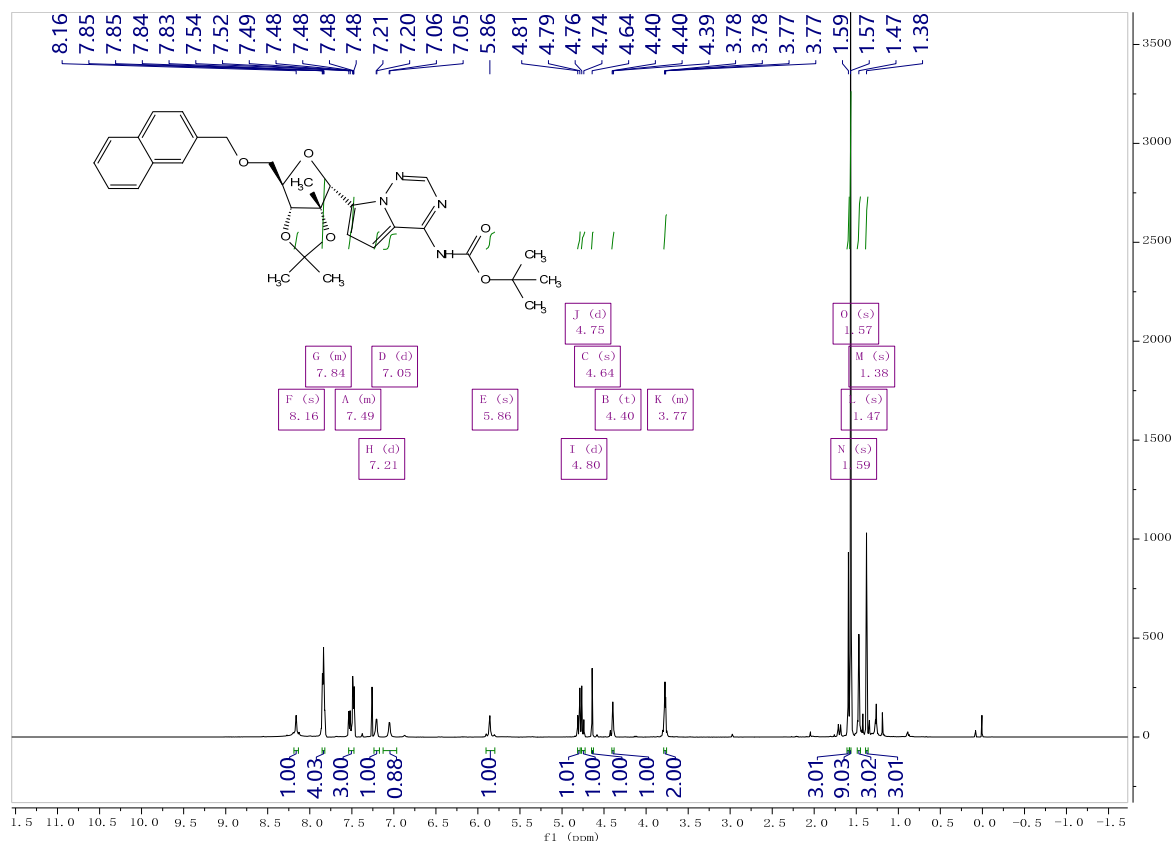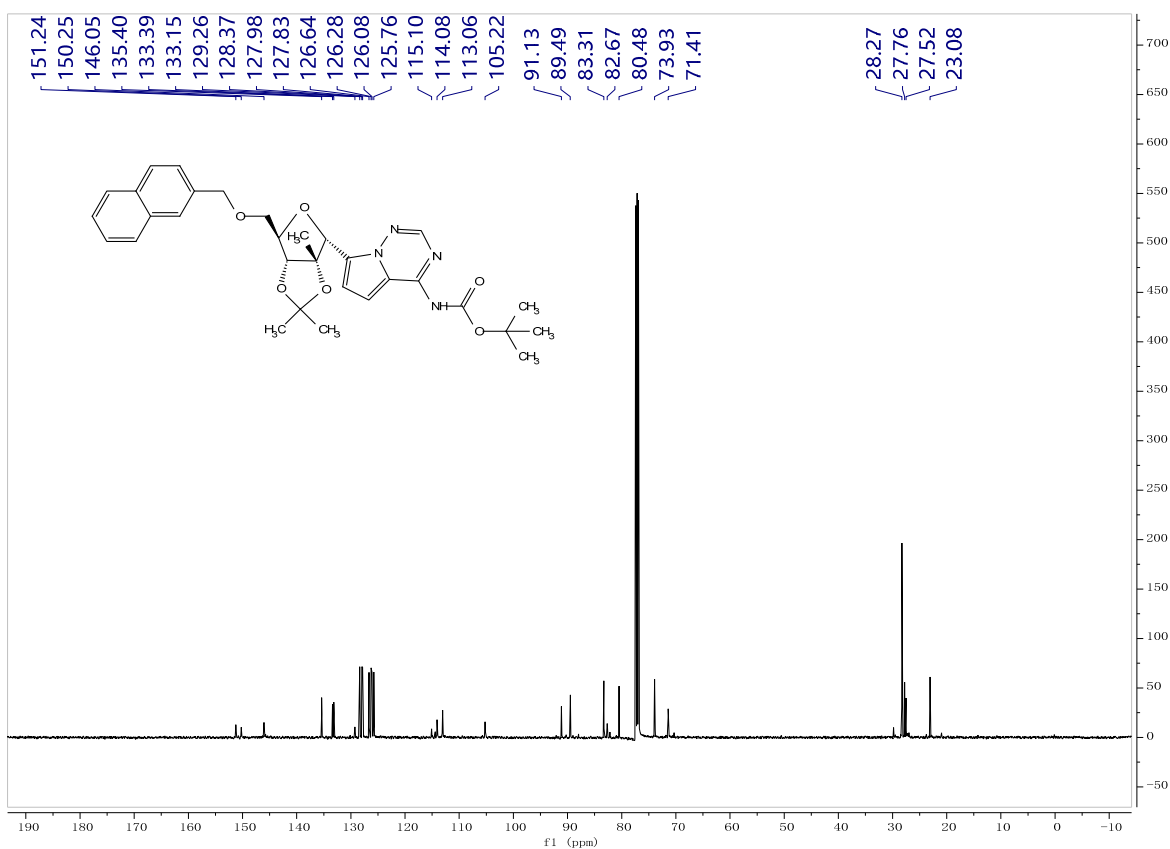

# Compound 21b

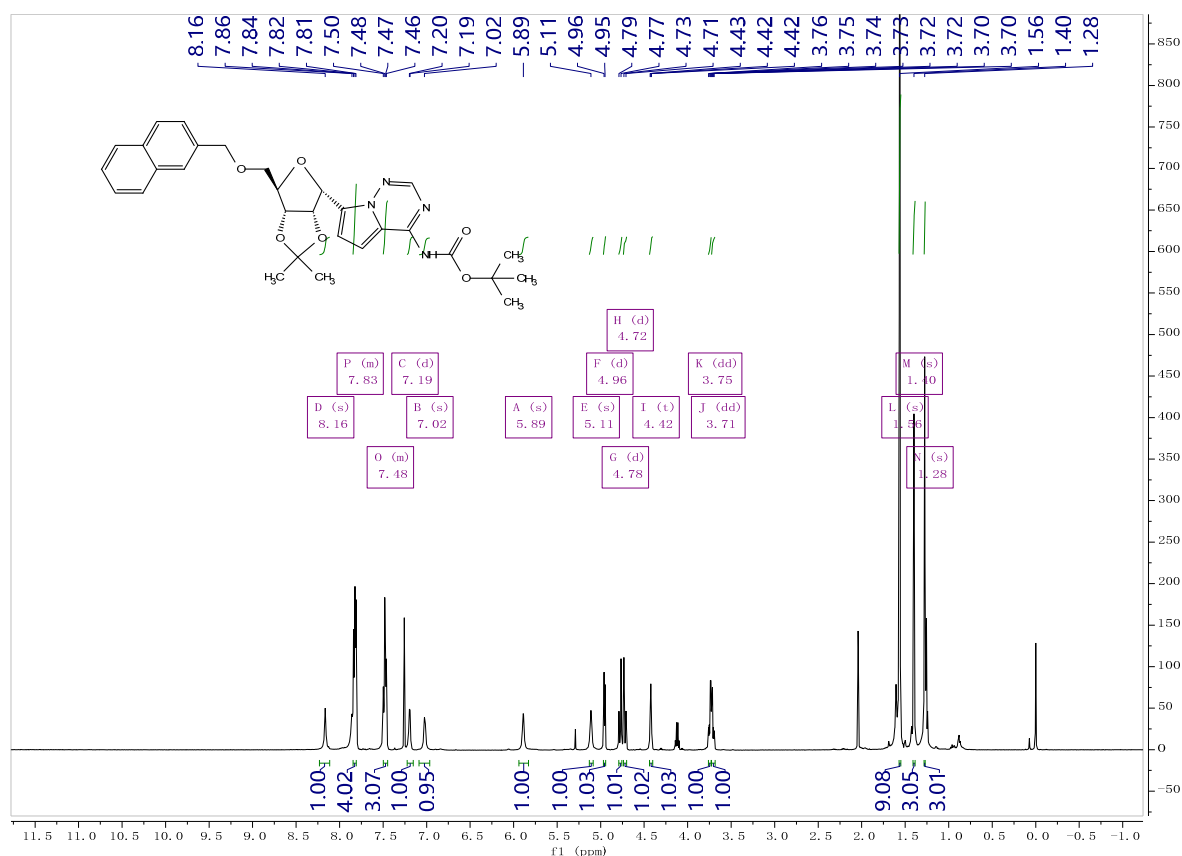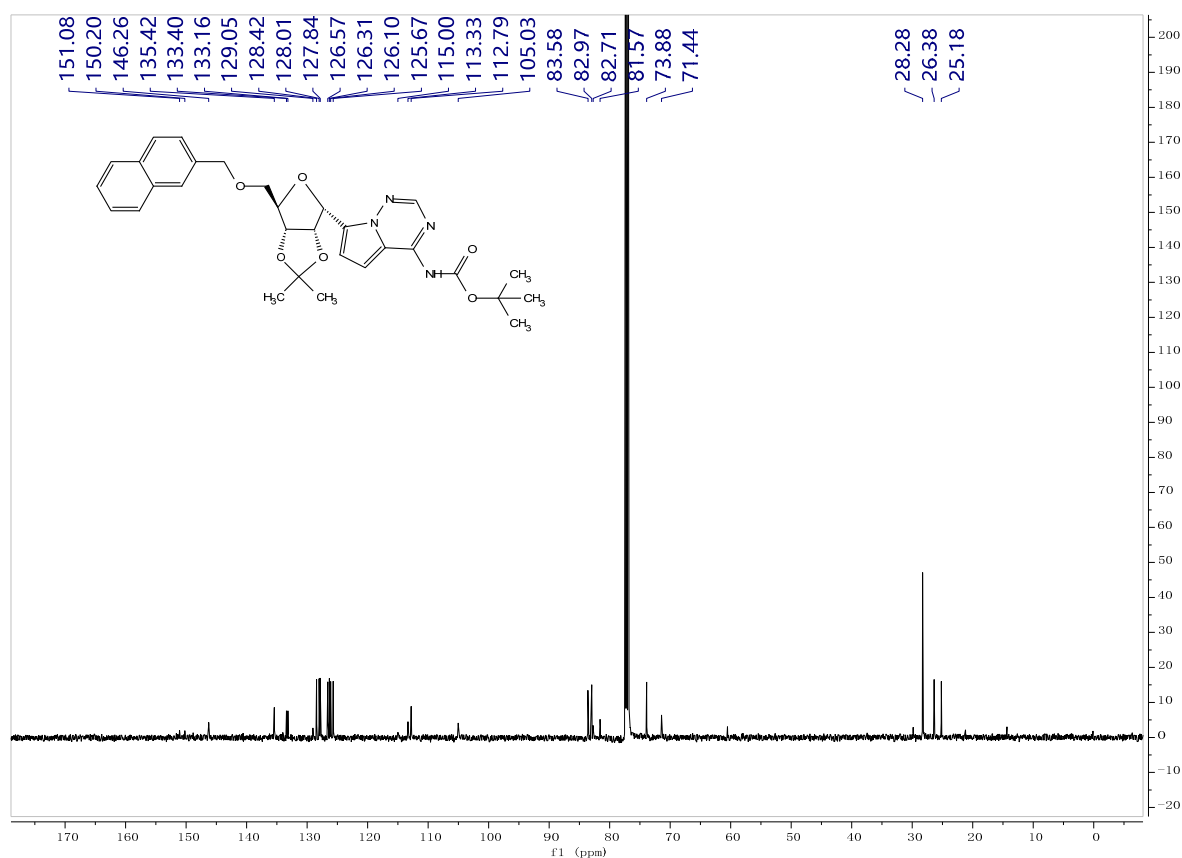

# Compound 22a

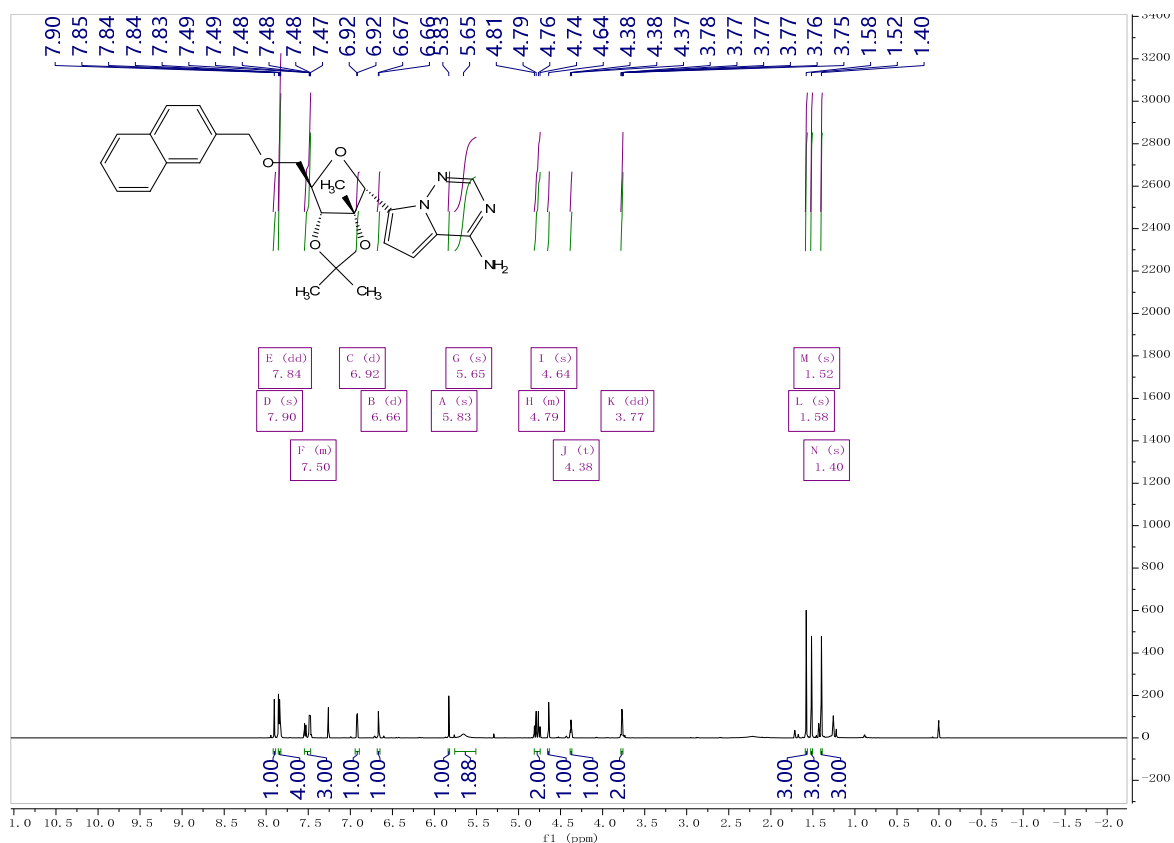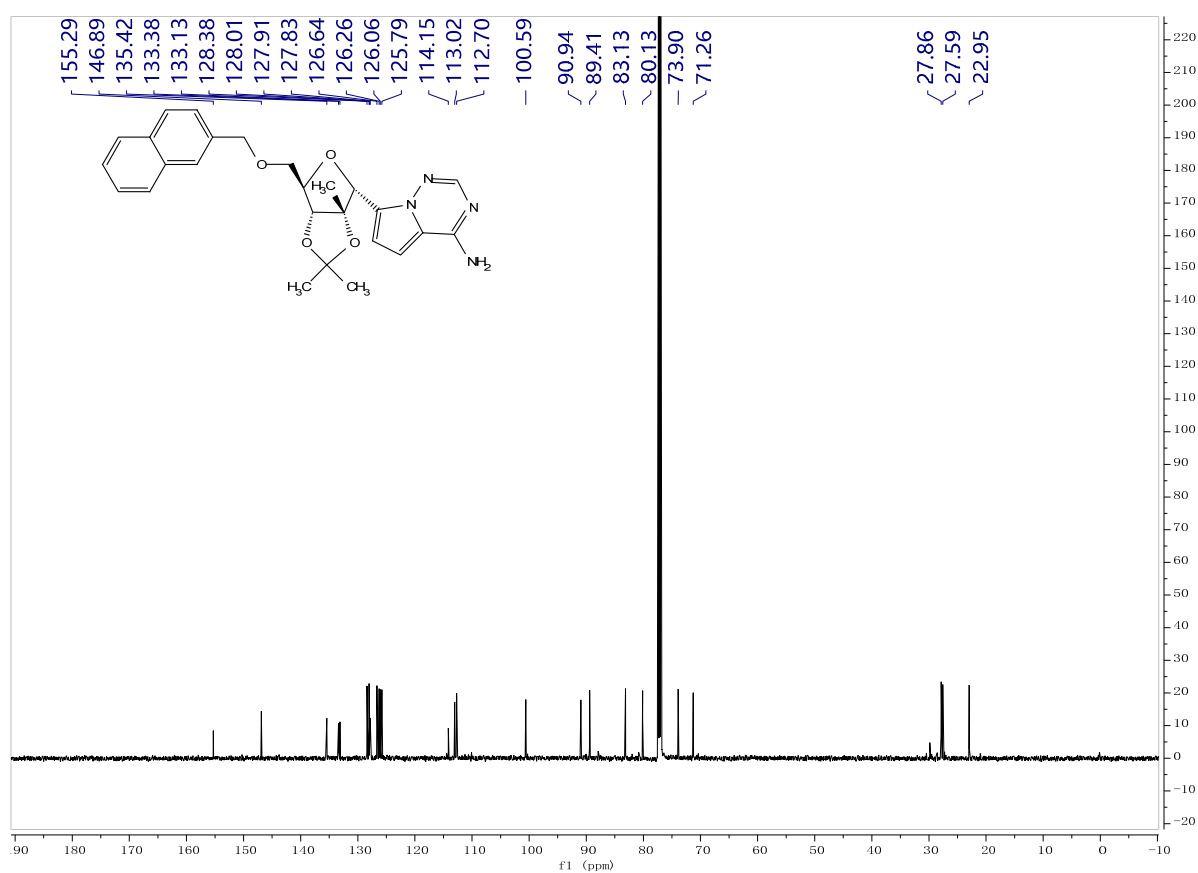



# Compound 22b

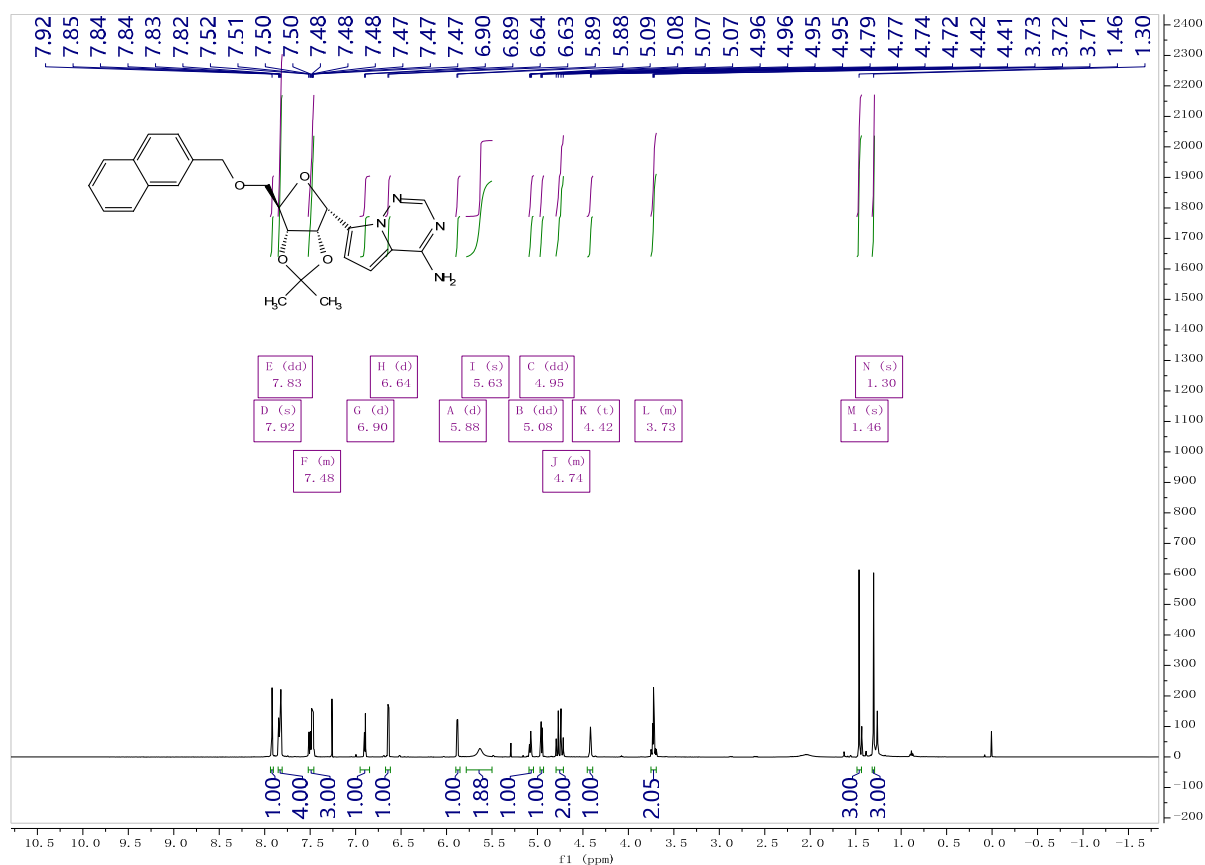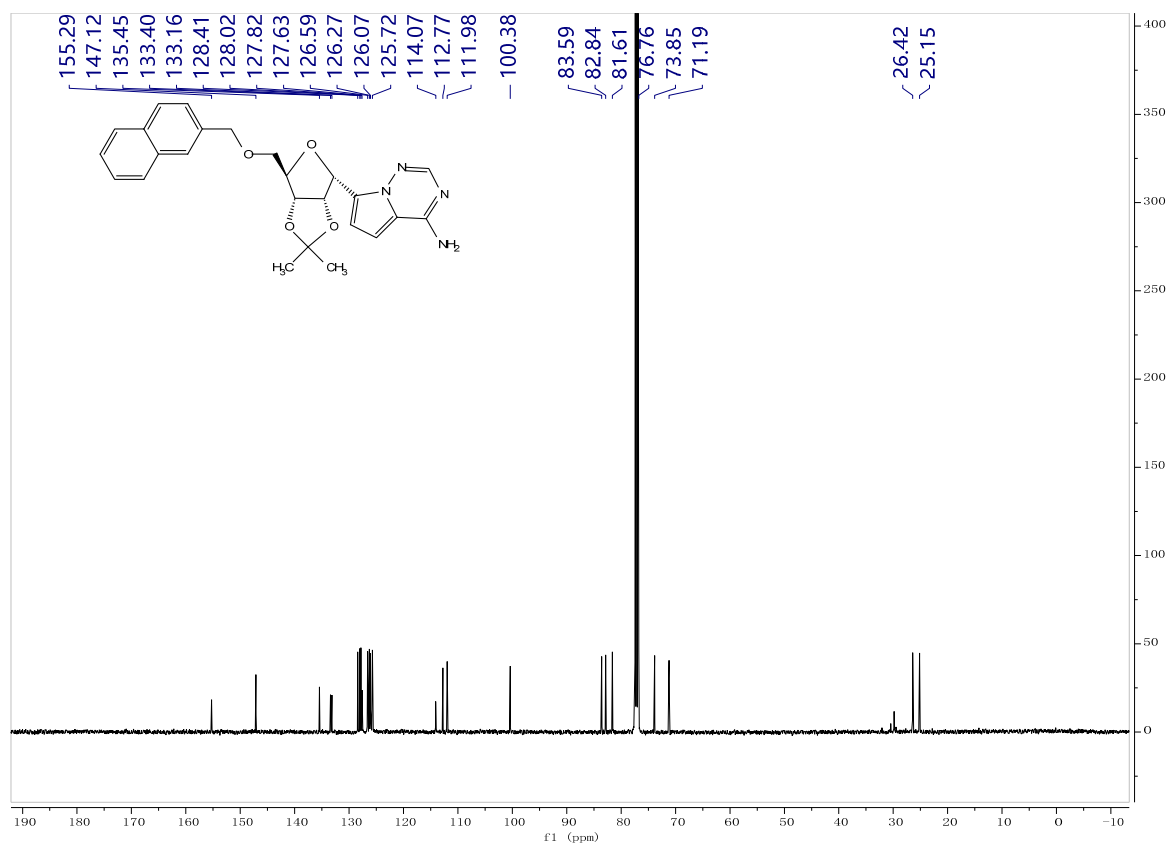

Compound **24a**

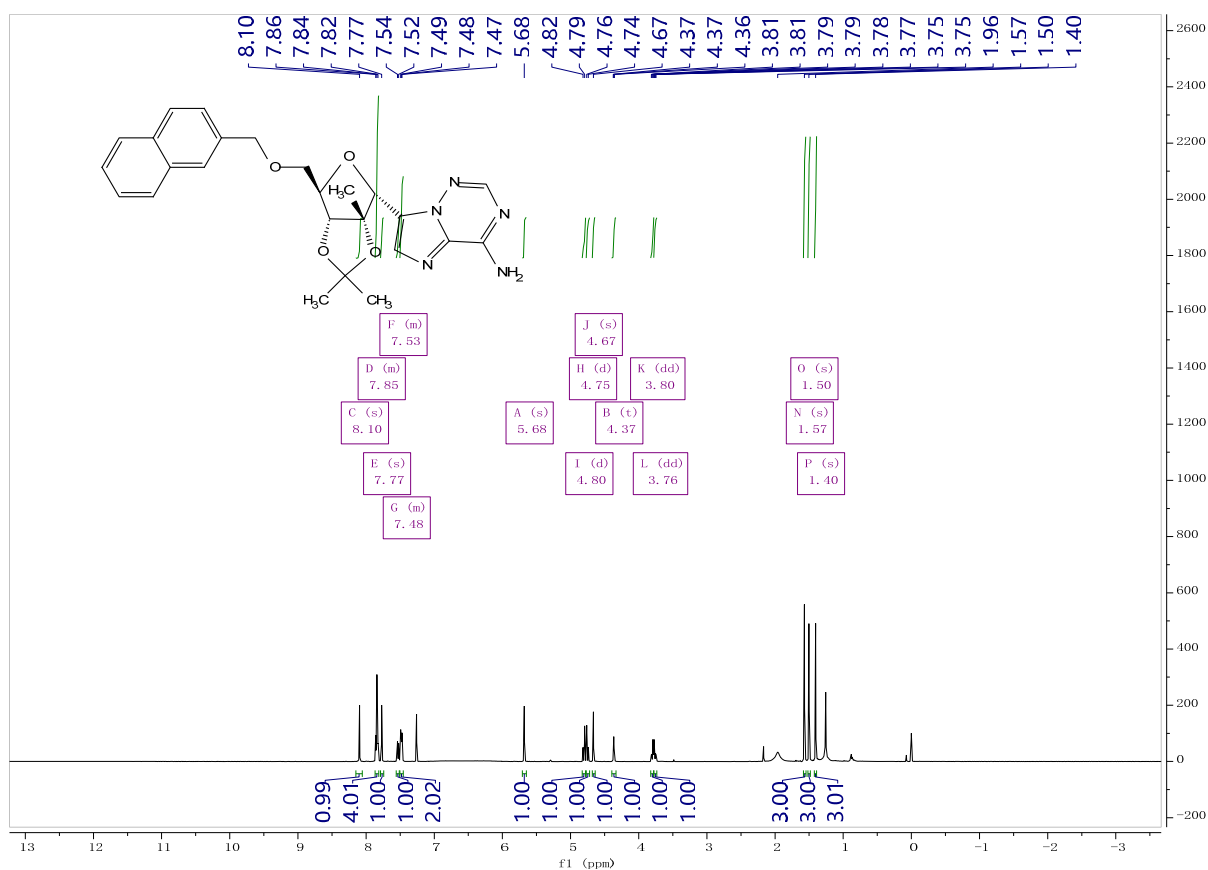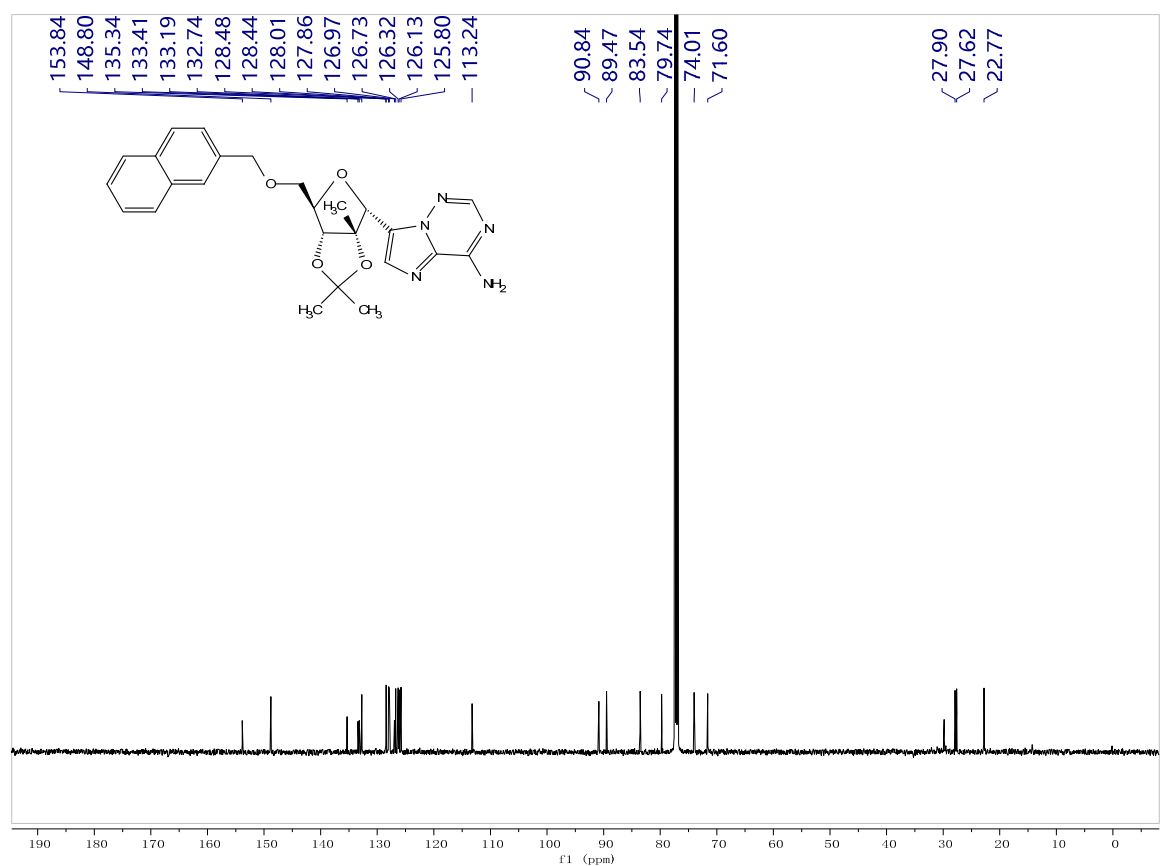

# Compound 24b

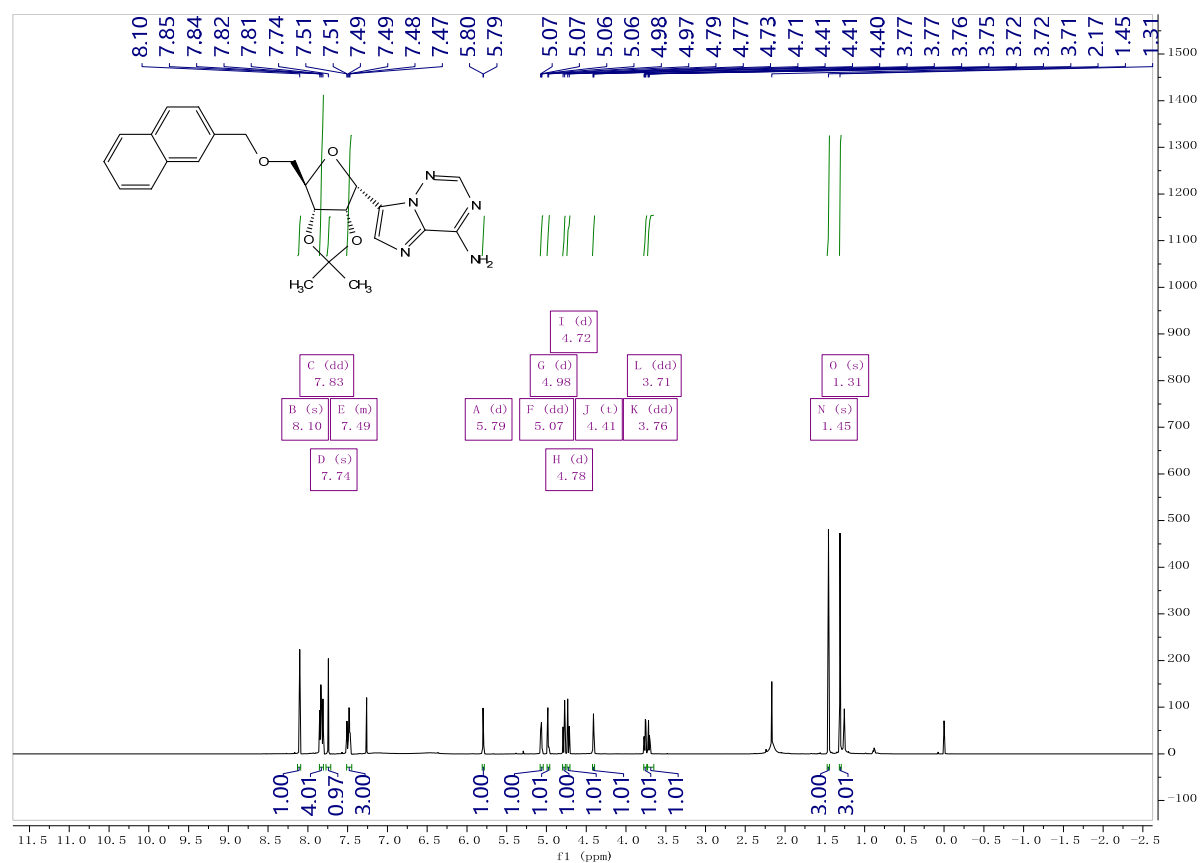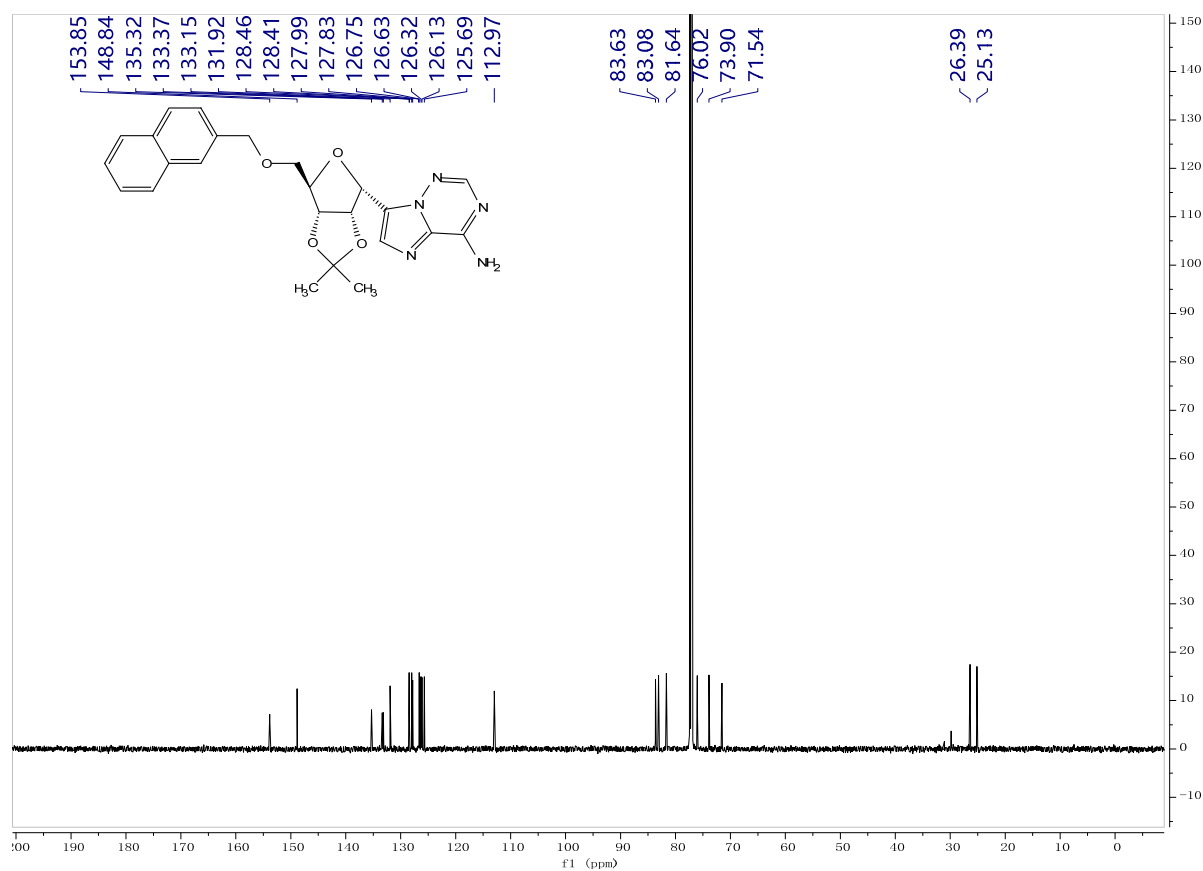

# Compound 26a

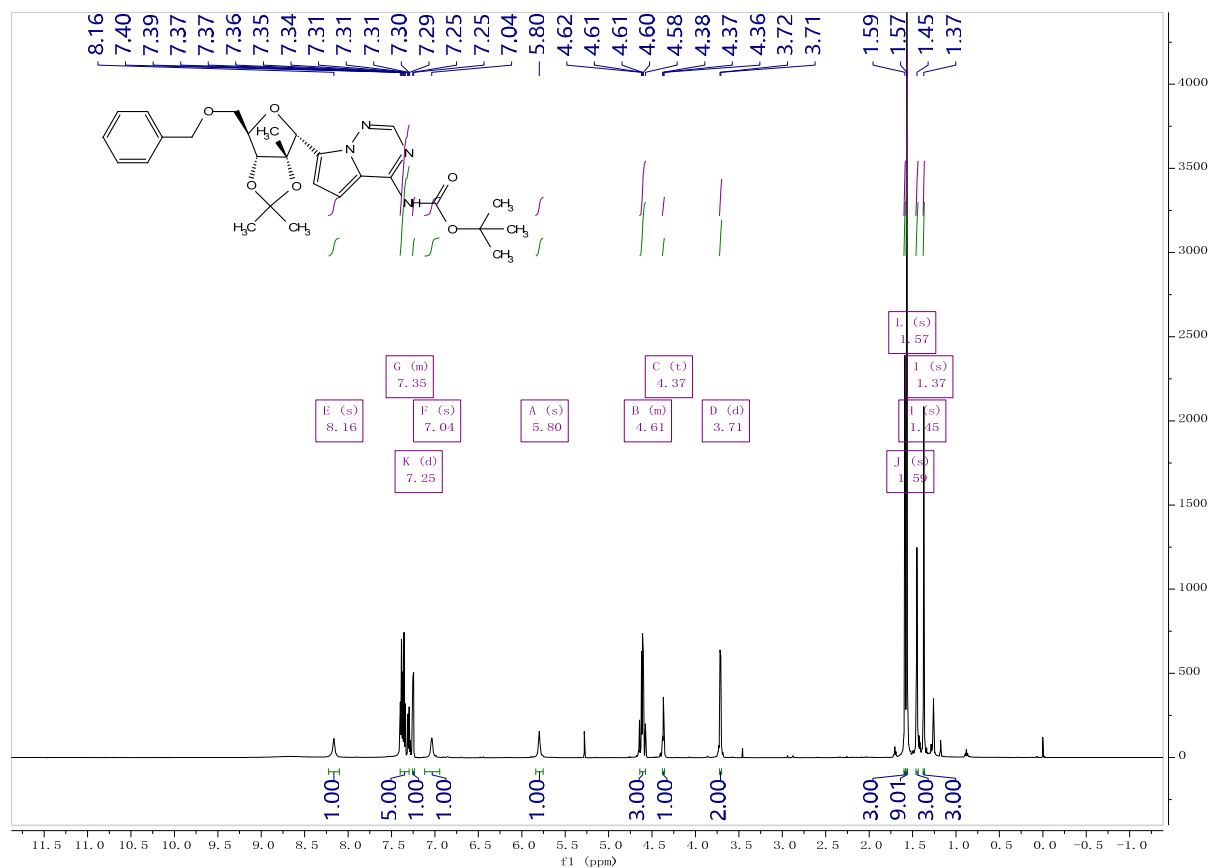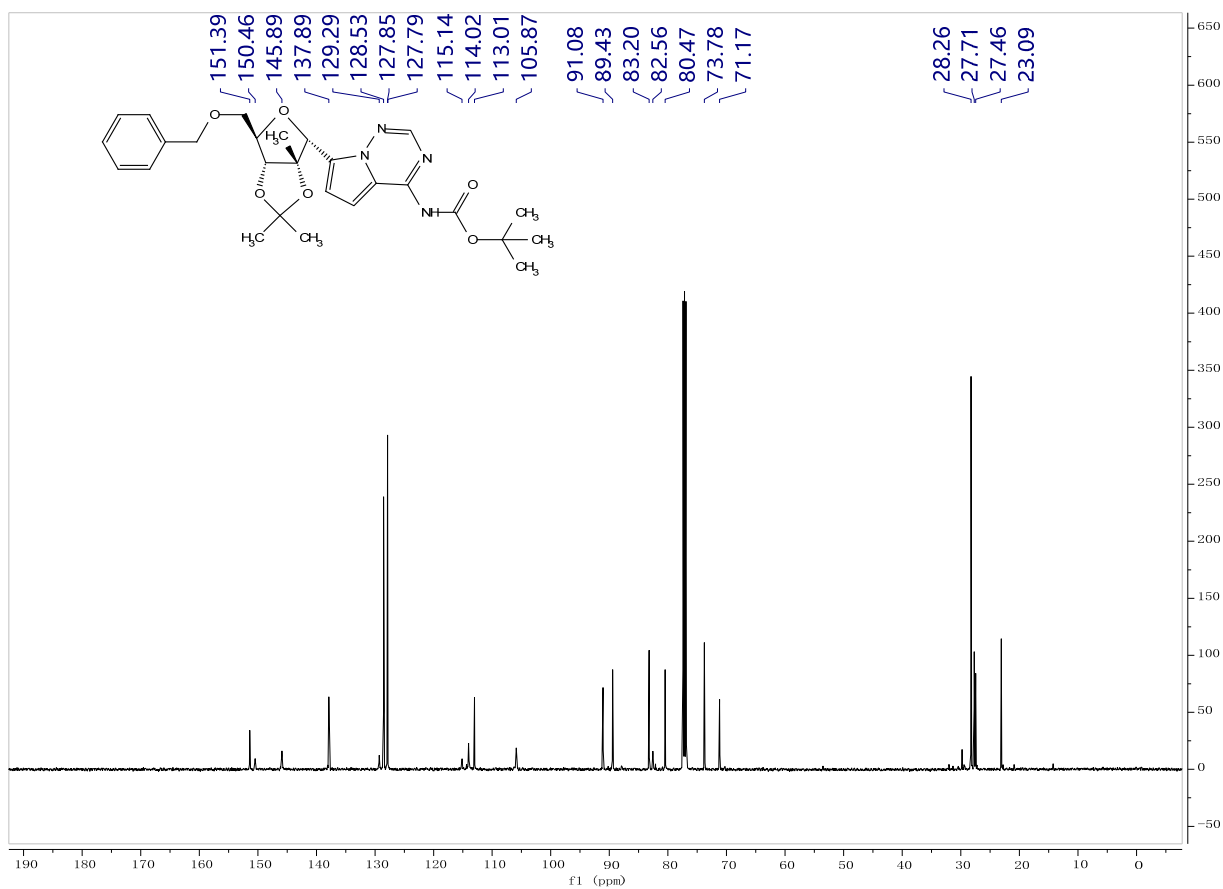

# Compound 26b

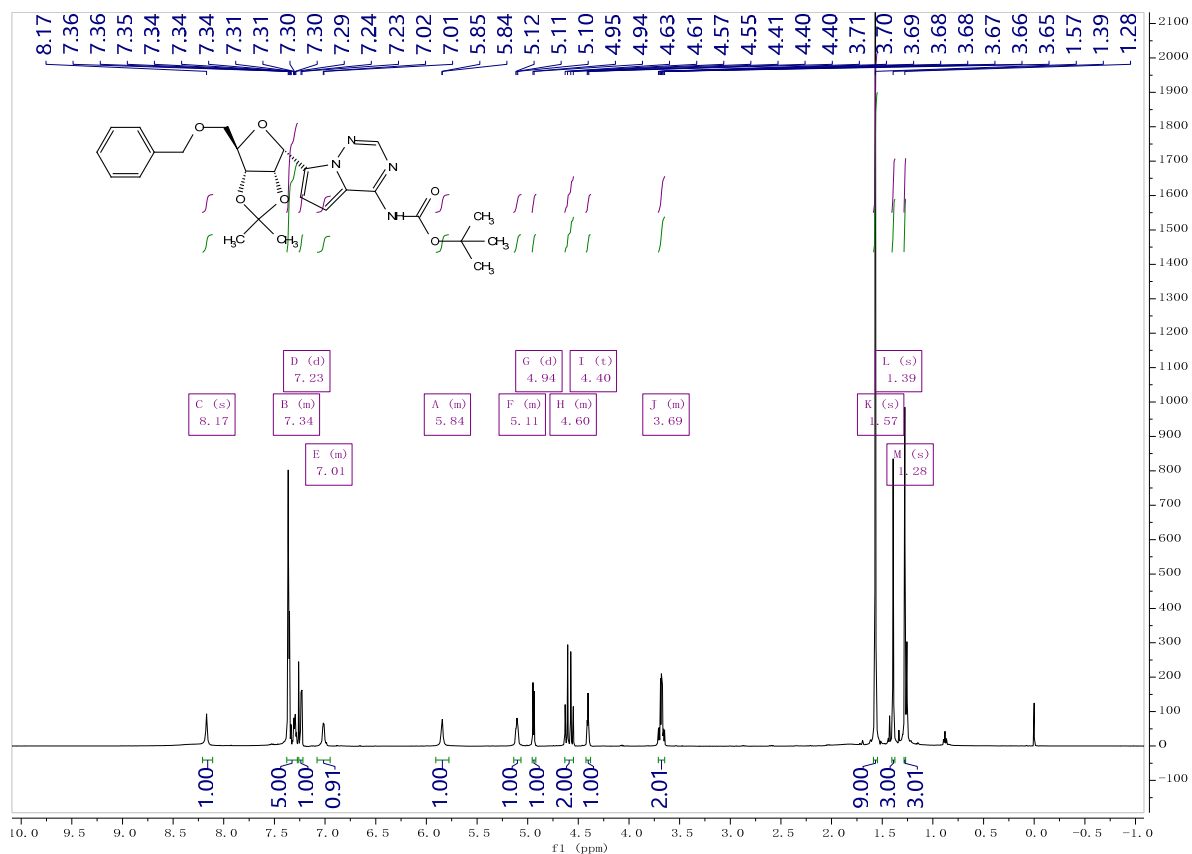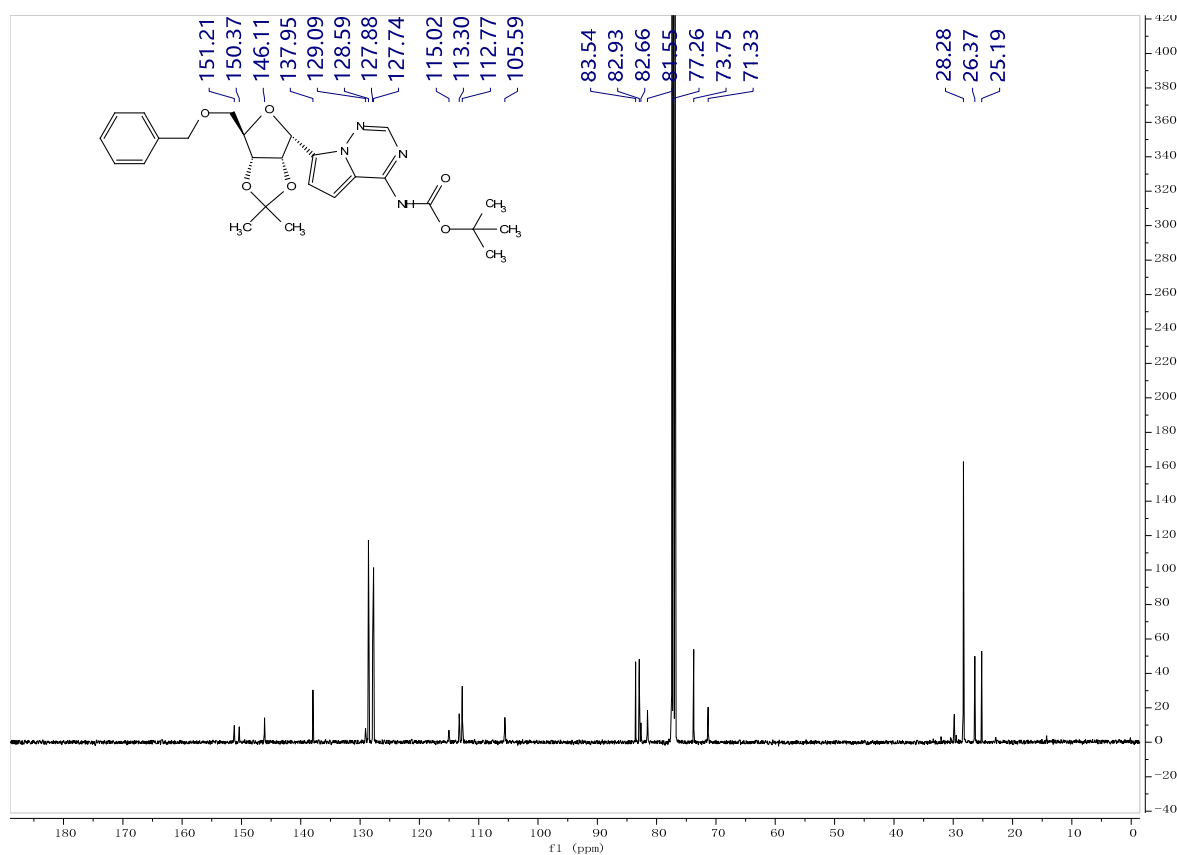

# Compound 27a

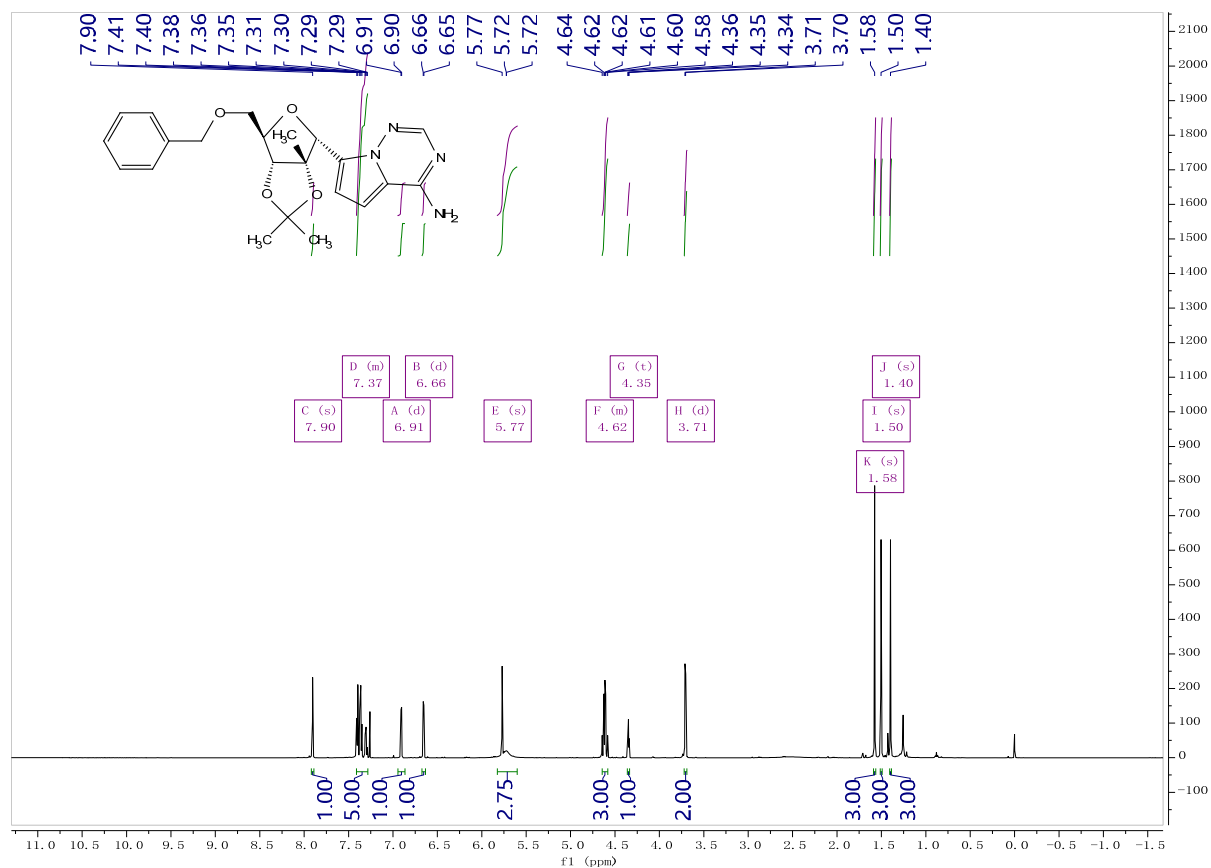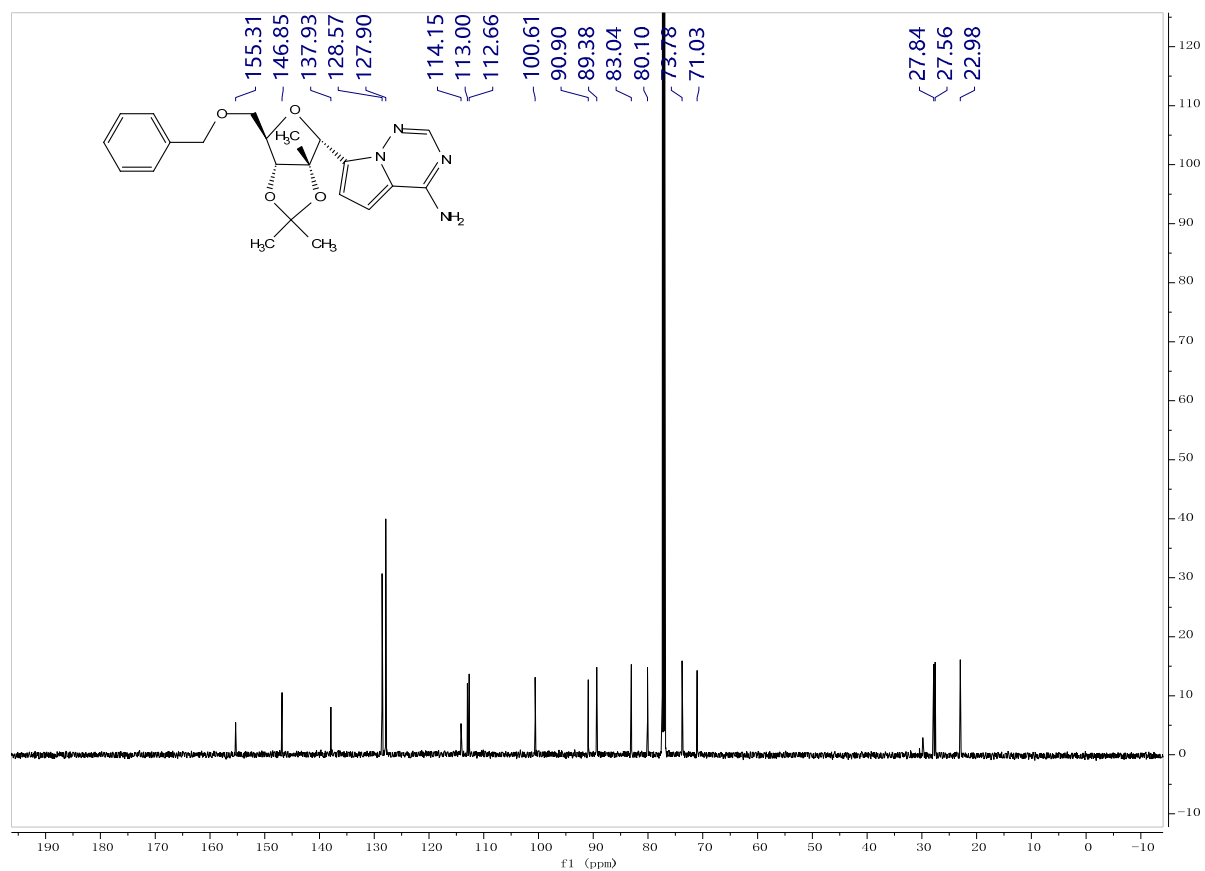

# Compound 27b

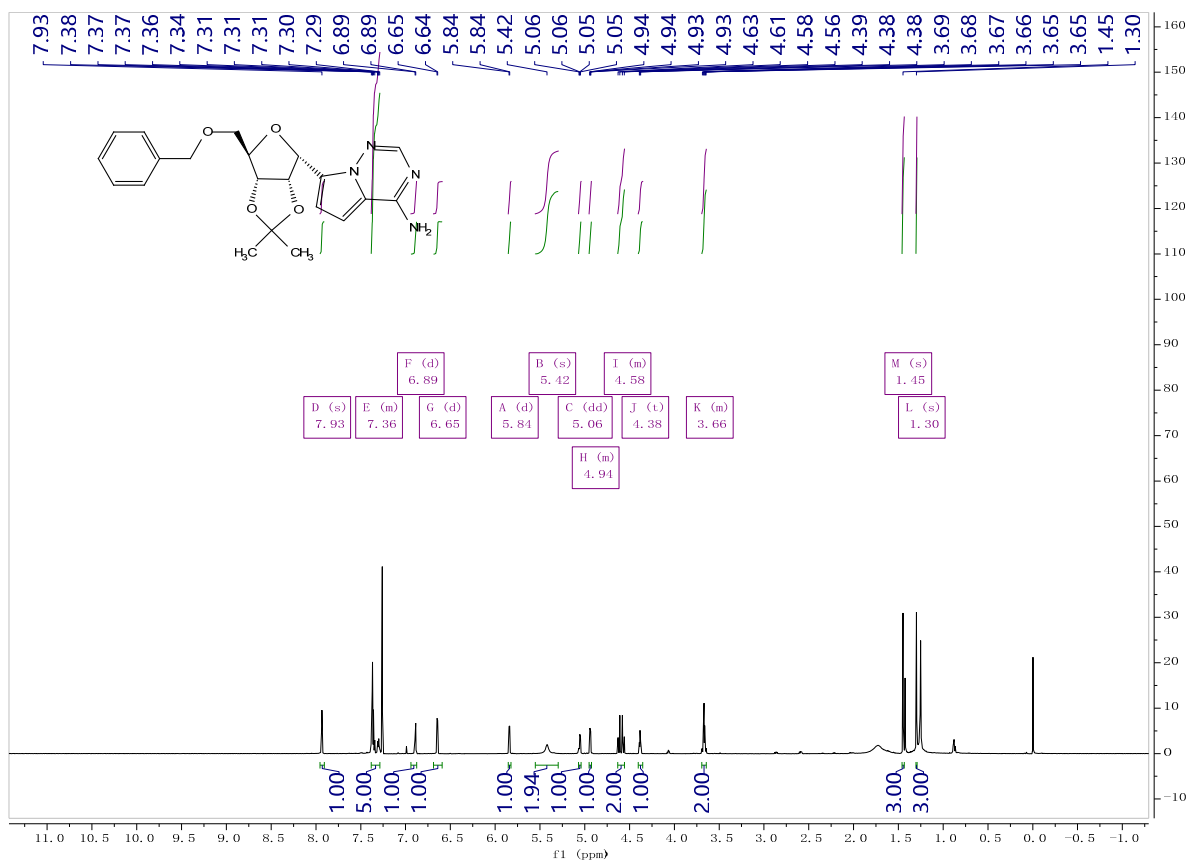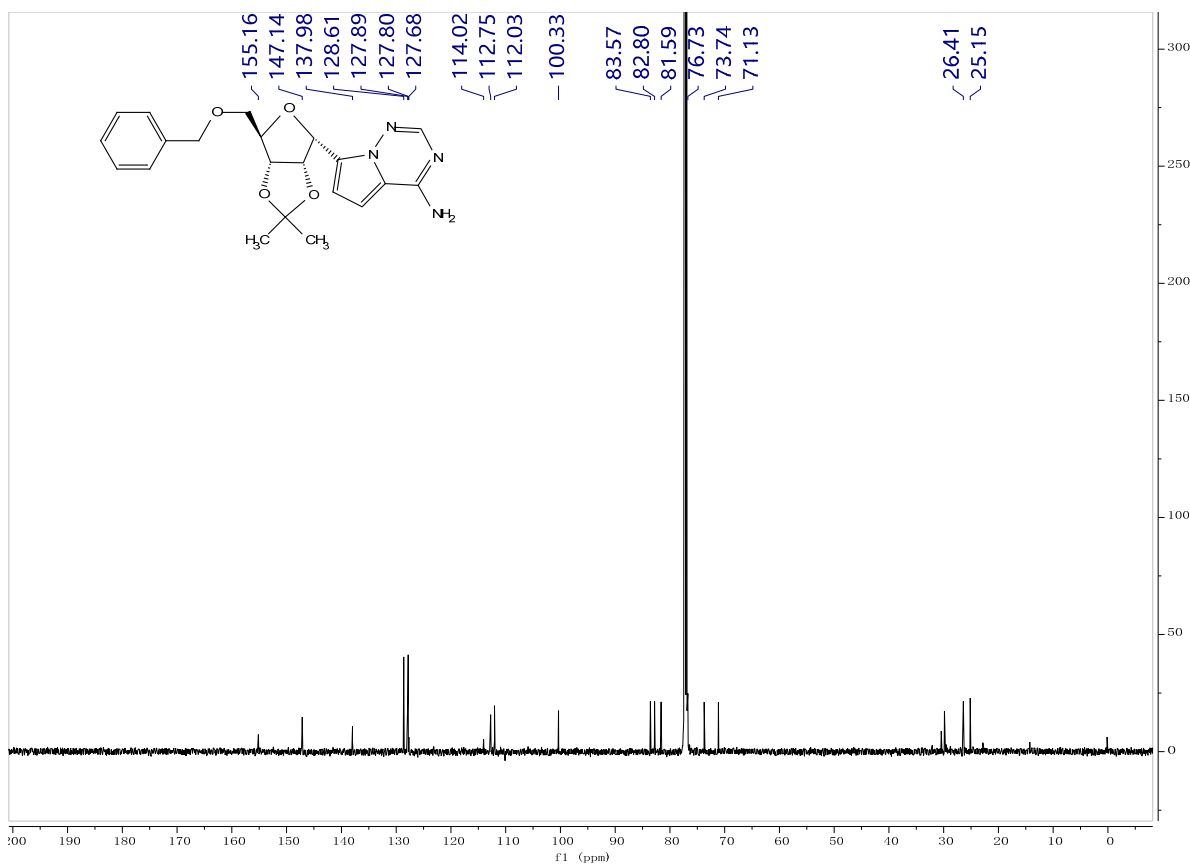

# Compound 29a

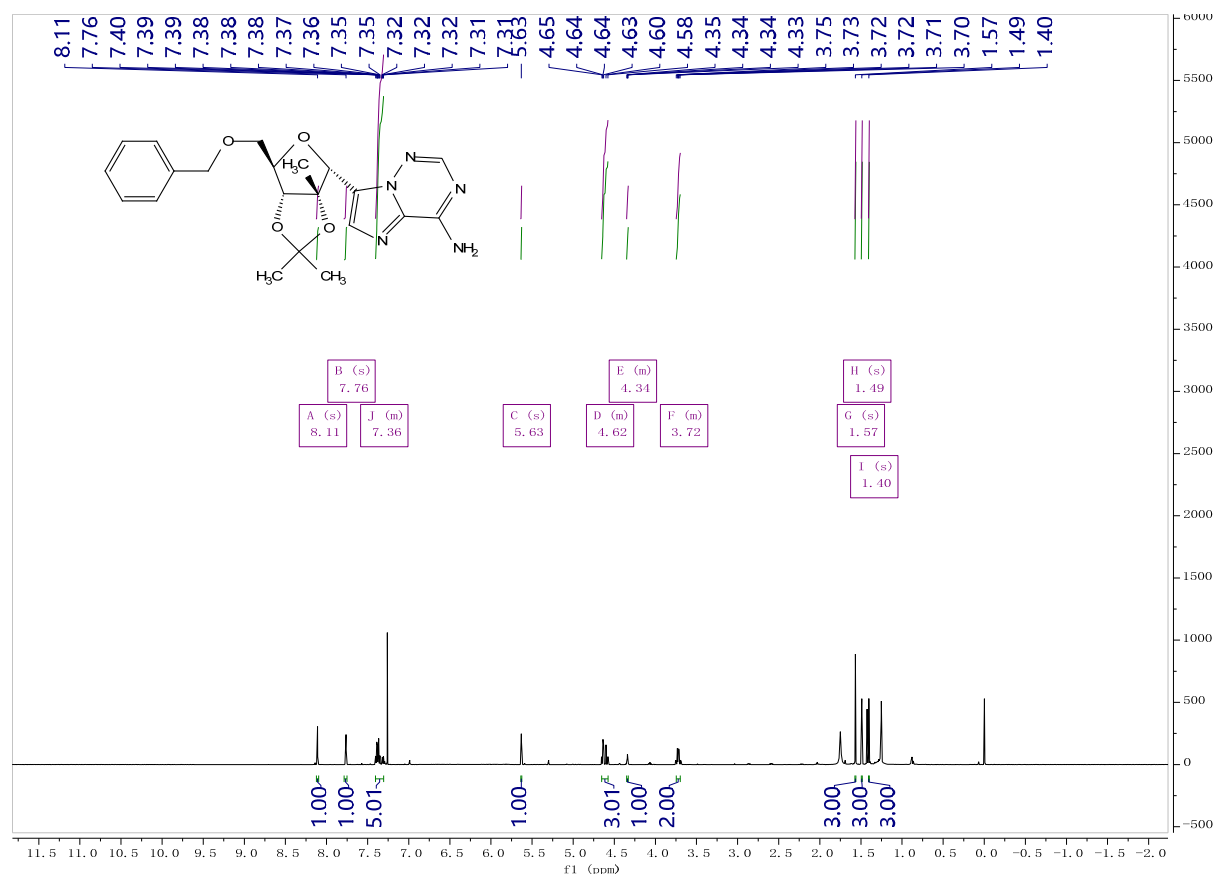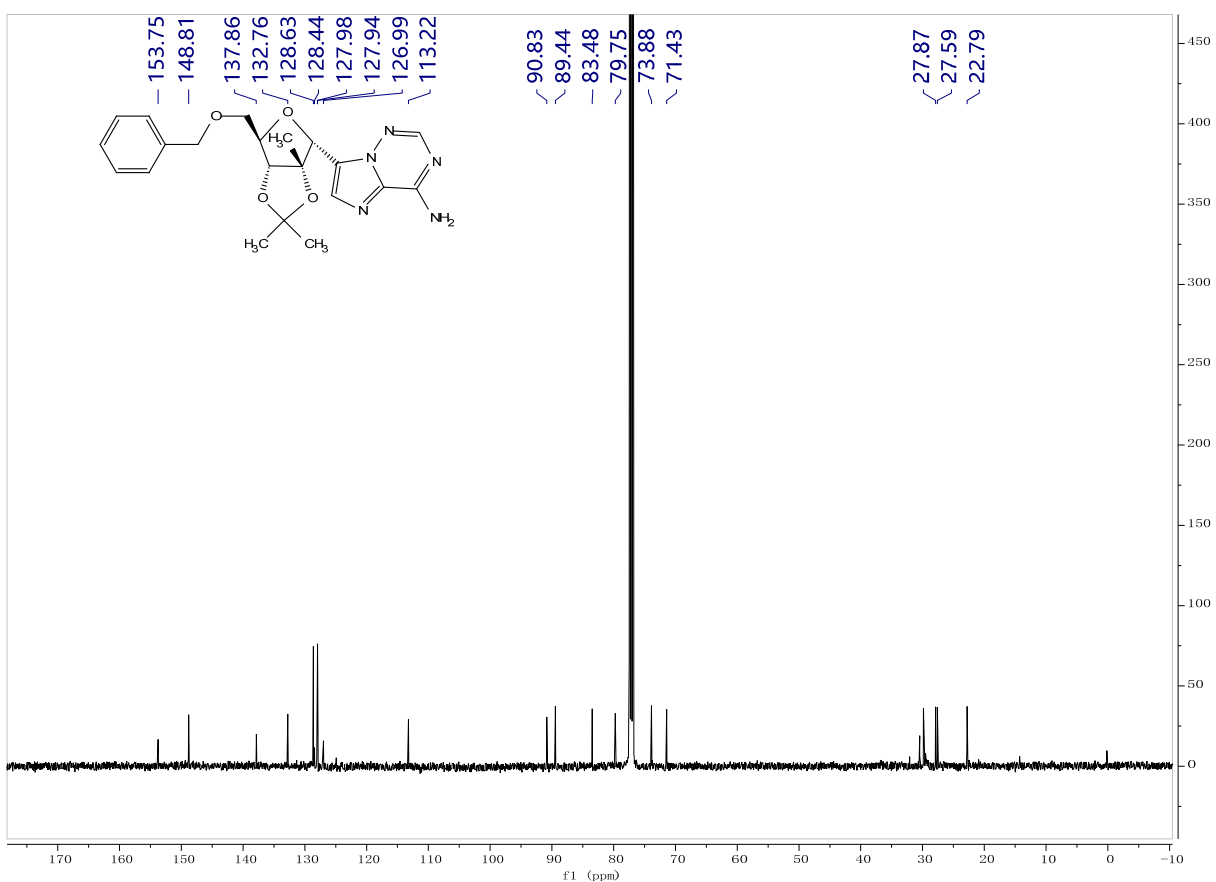



Chemical structure of compound 10 is shown. The structure is a purine derivative with a benzyl group, a methyl group, and a dimethylamino group. The peaks are assigned to various protons in the molecule. The x-axis is labeled 'f1 (ppm)' and ranges from 11.5 to -1.5. The y-axis is labeled 'Intensity' and ranges from 0 to 500. The peaks are labeled with their chemical shifts and integrations. The integrations are: 1.00, 1.00, 5.00, 1.00, 1.00, 2.00, 1.00, 1.00, 3.00, 3.00.

| Label  | Chemical Shift (ppm) | Integration |
|--------|----------------------|-------------|
| A (s)  | 8.12                 | 1.00        |
| B (s)  | 7.74                 | 1.00        |
| C (d)  | 5.76                 | 1.00        |
| D (m)  | 7.35                 | 5.00        |
| E (dd) | 5.06                 | 1.00        |
| F (d)  | 4.97                 | 1.00        |
| G (m)  | 4.60                 | 2.00        |
| H (t)  | 4.39                 | 1.00        |
| I (dd) | 3.71                 | 1.00        |
| J (dd) | 3.67                 | 3.00        |
| K (s)  | 1.45                 | 3.00        |
| L (s)  | 1.31                 | 3.00        |

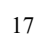

# Compound 31a

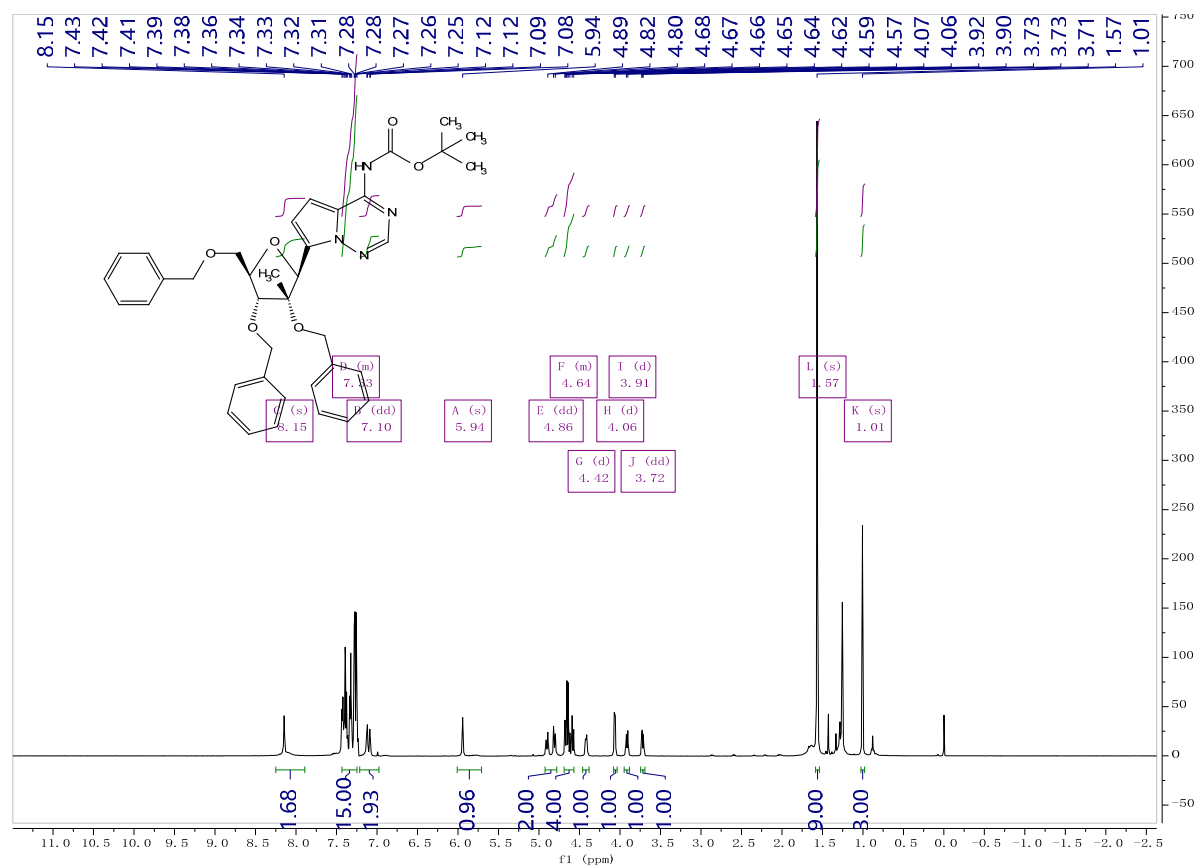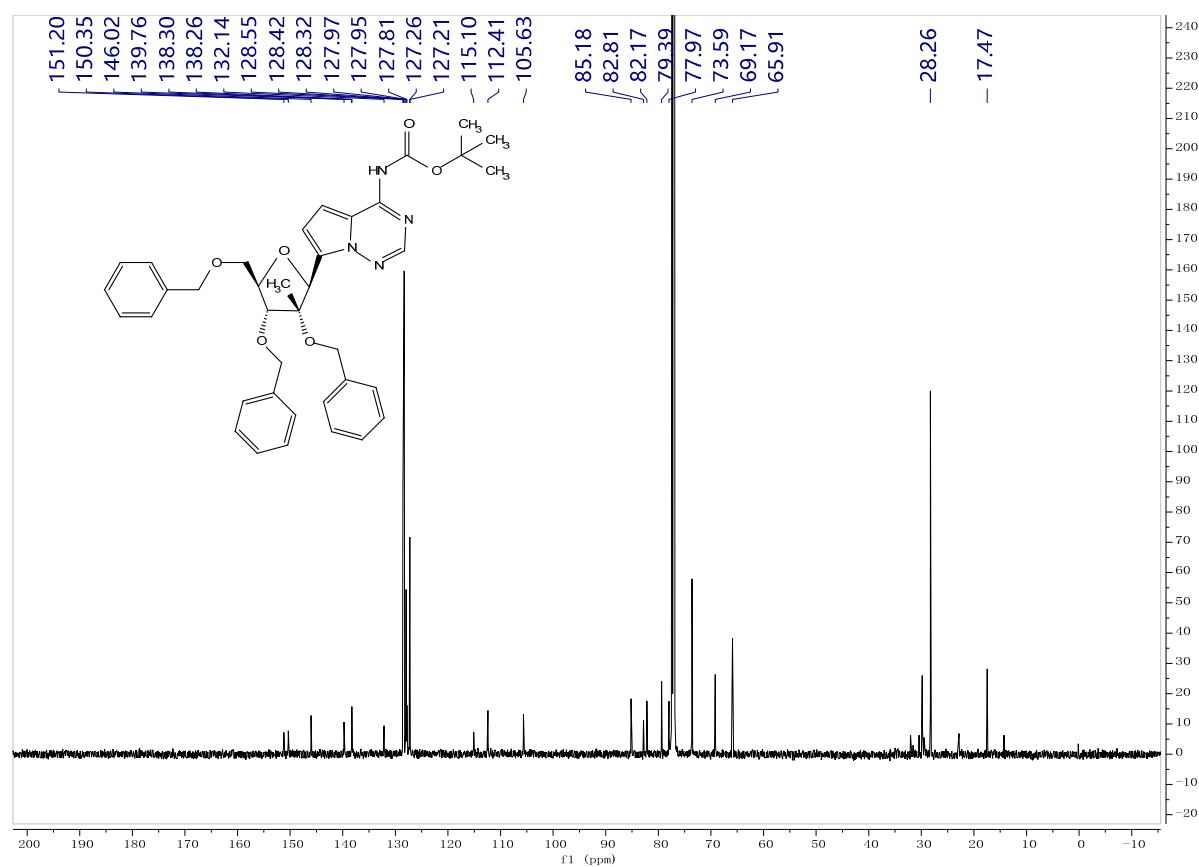

# Compound 31b

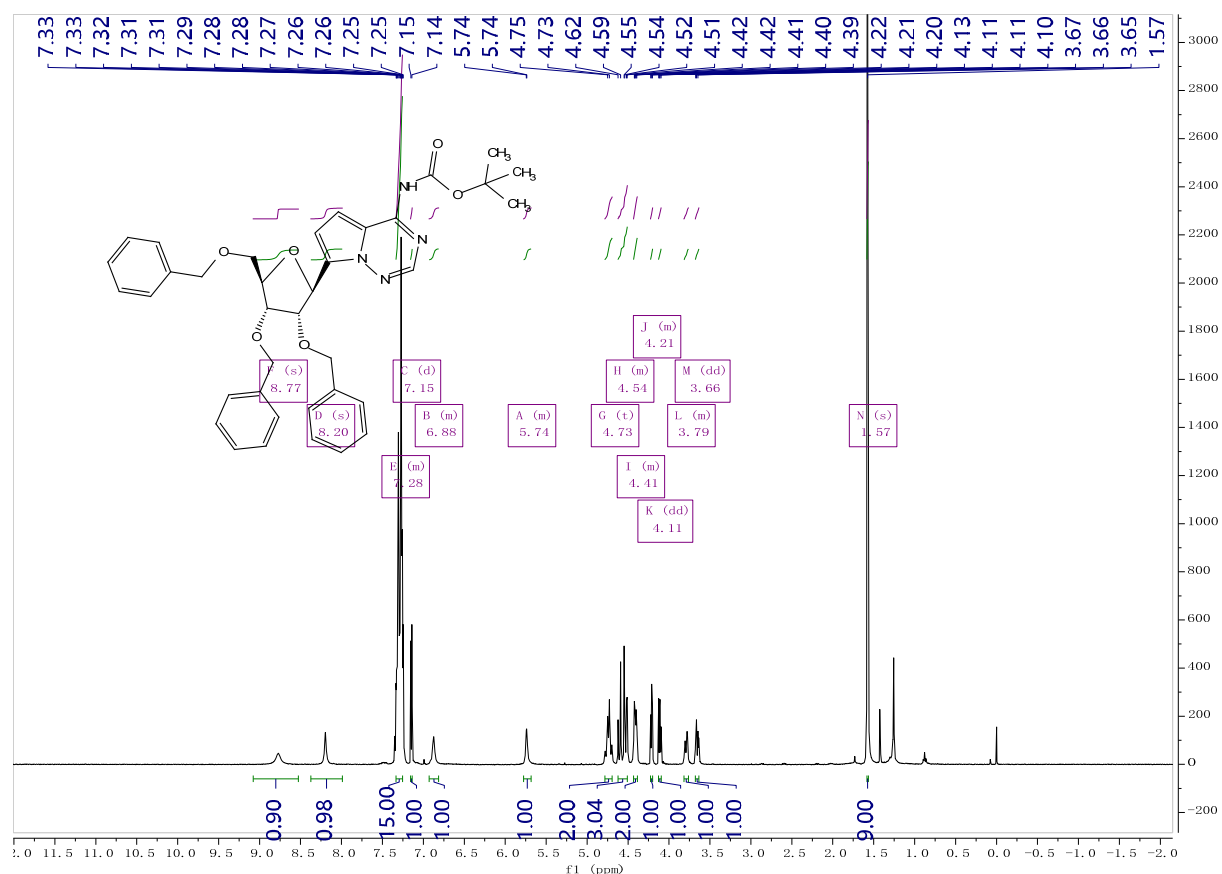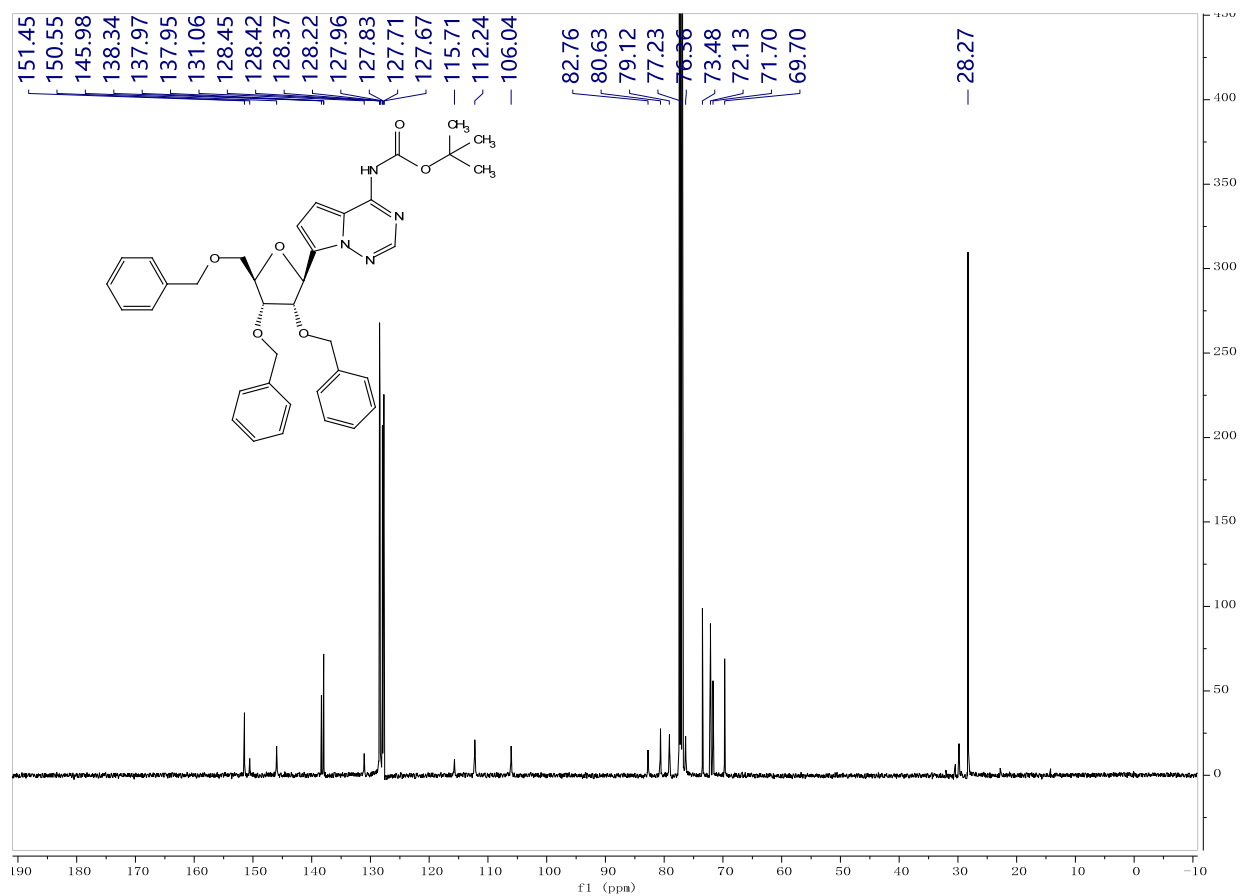

# Compound 37

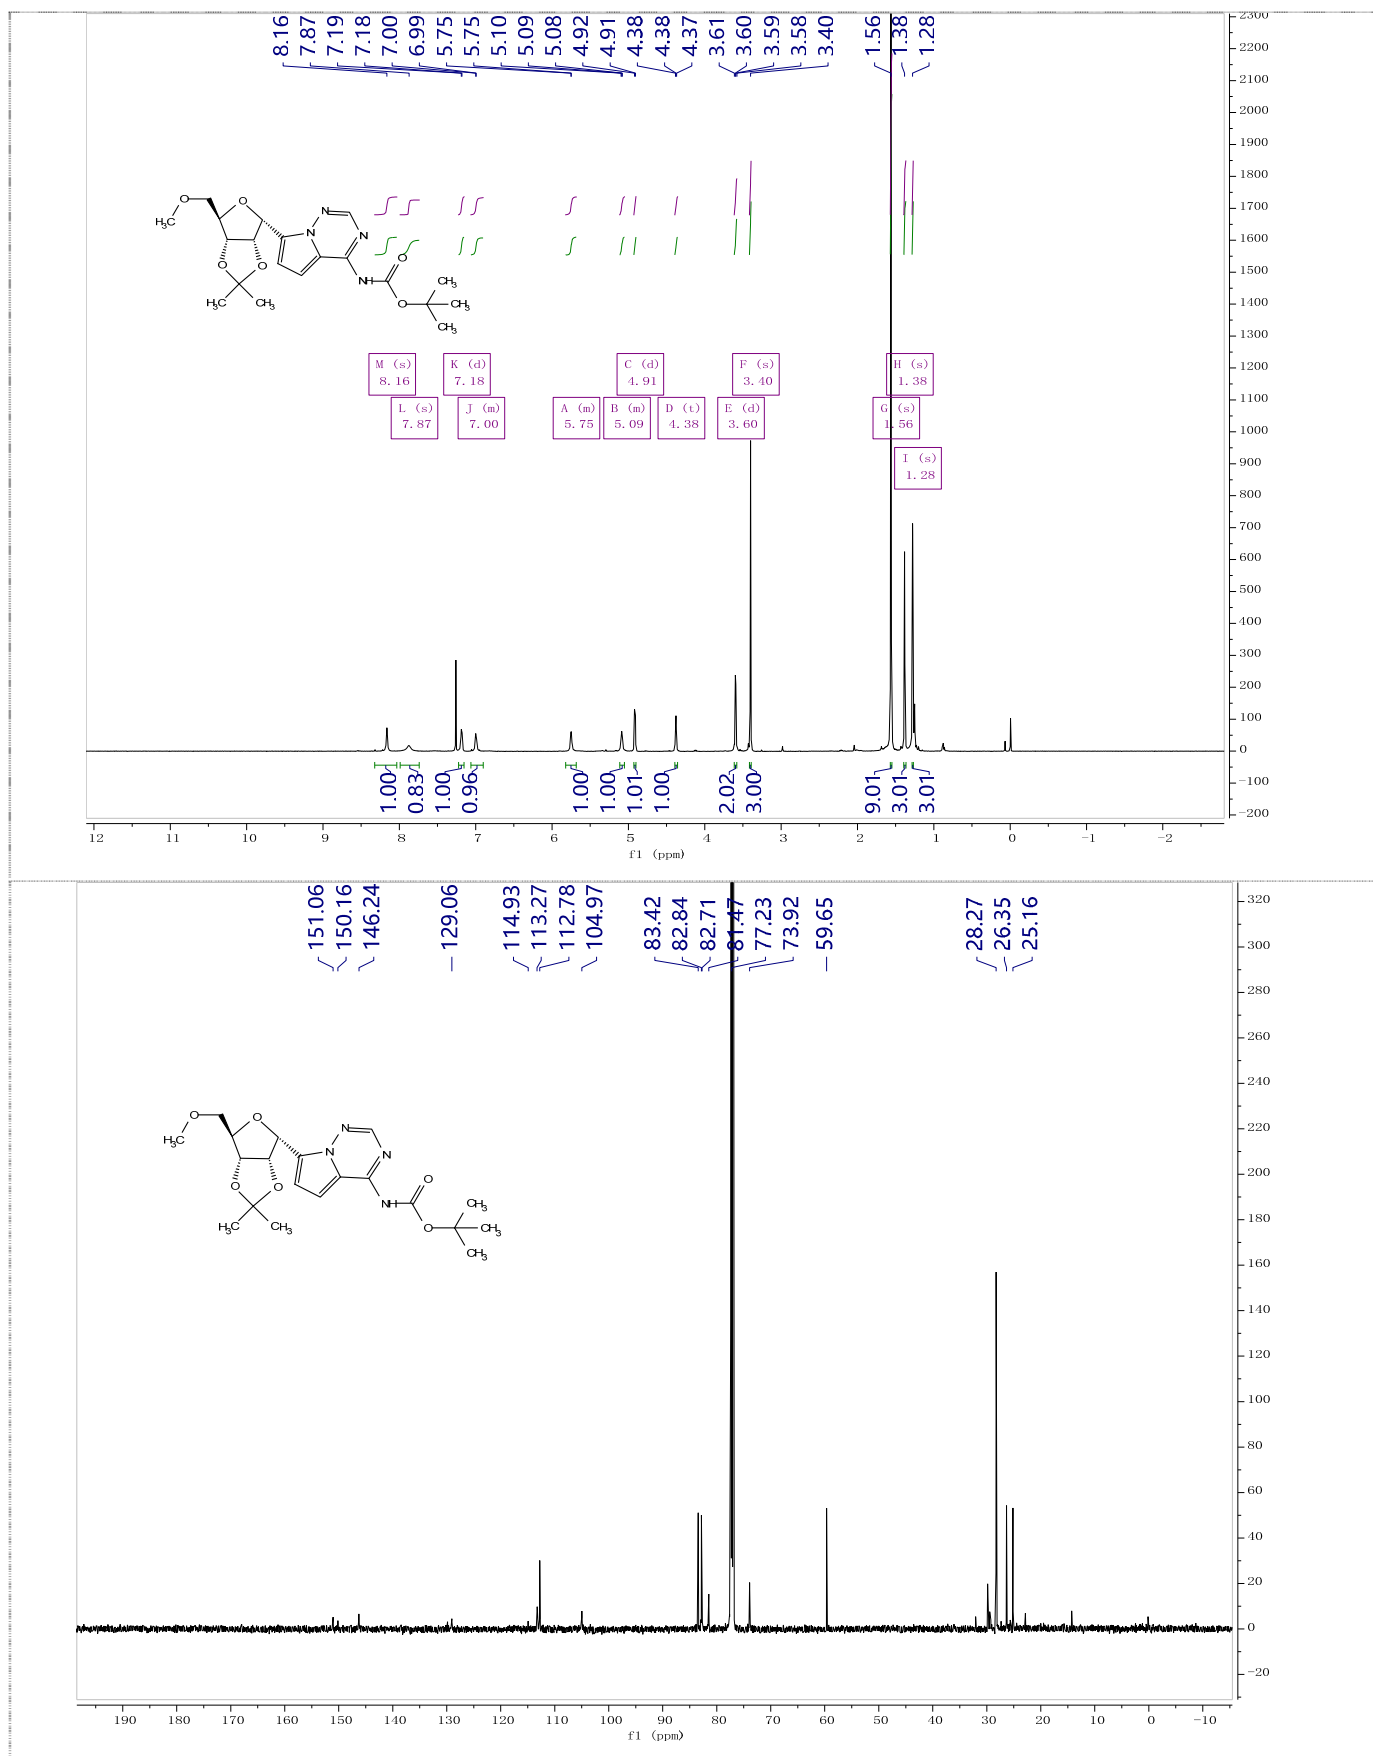

# Compound 38

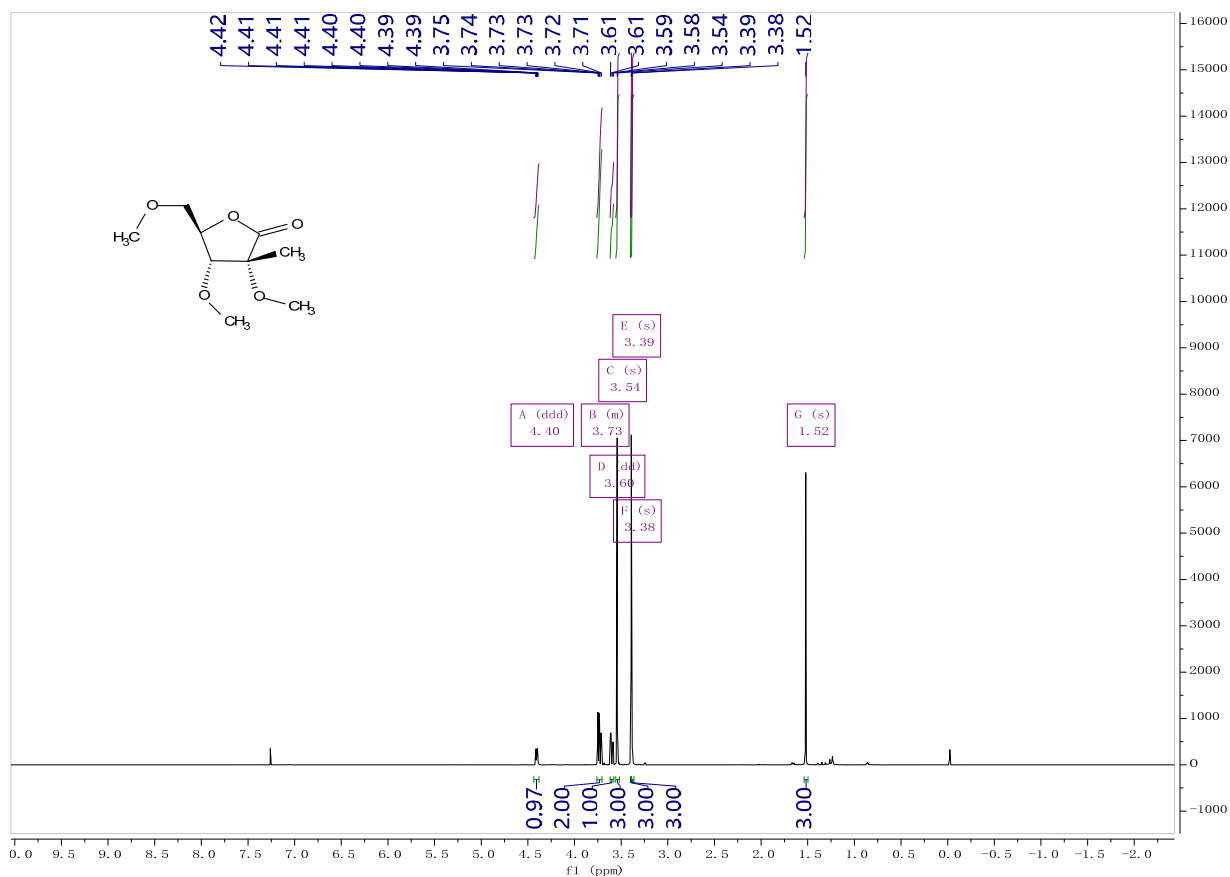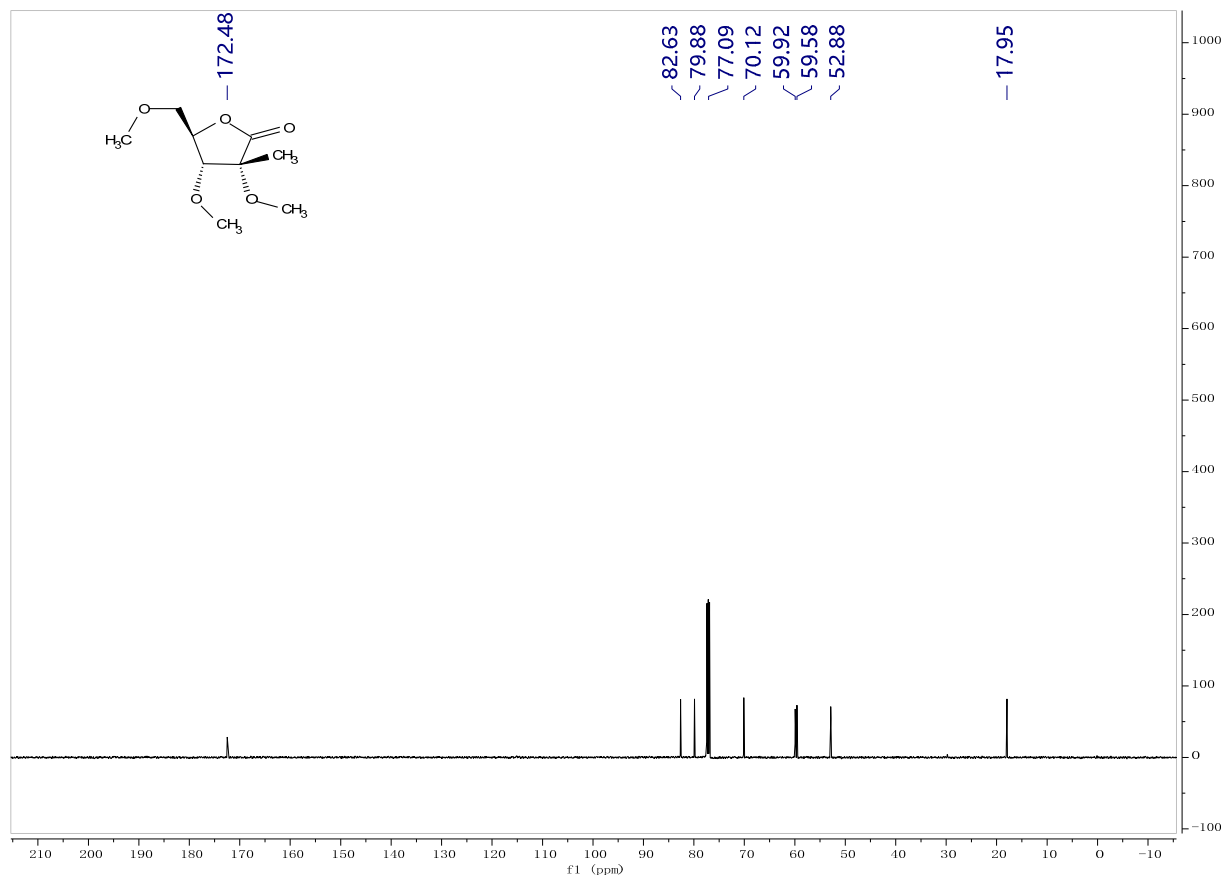

# Compound 40

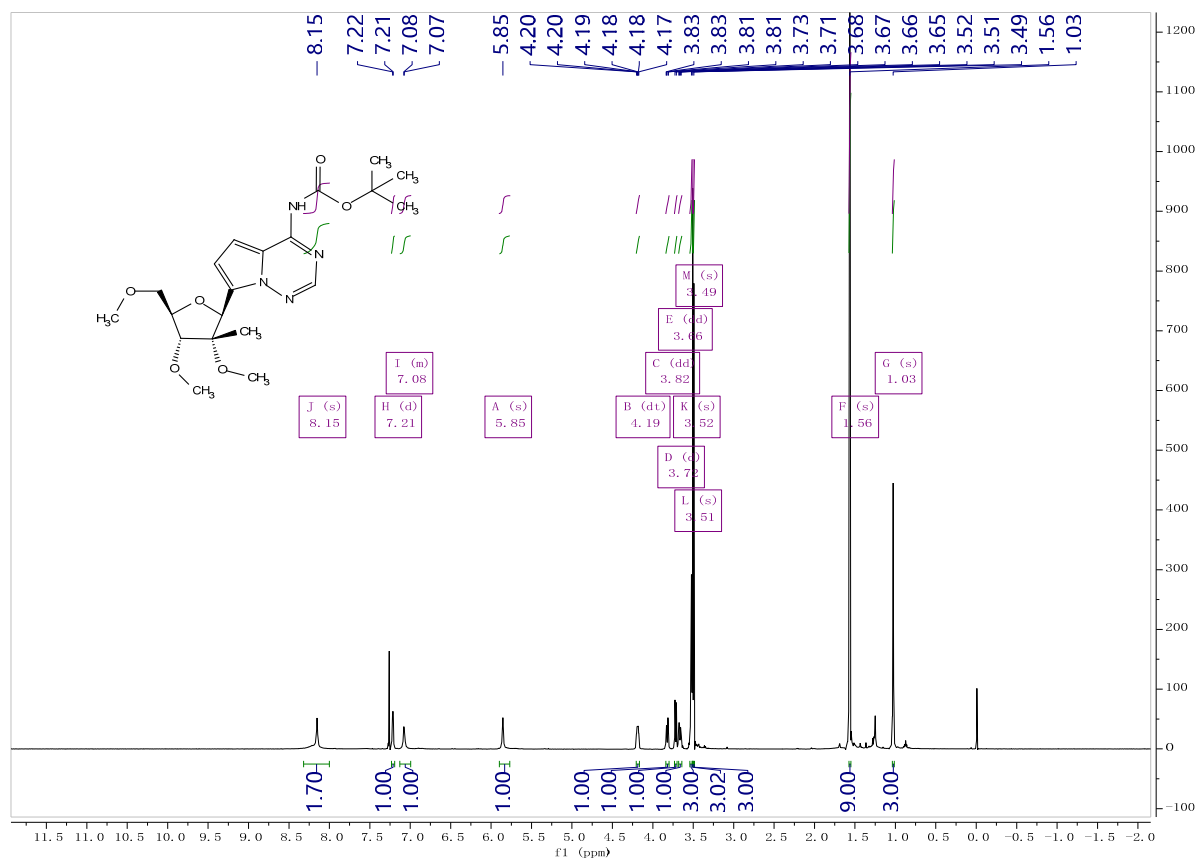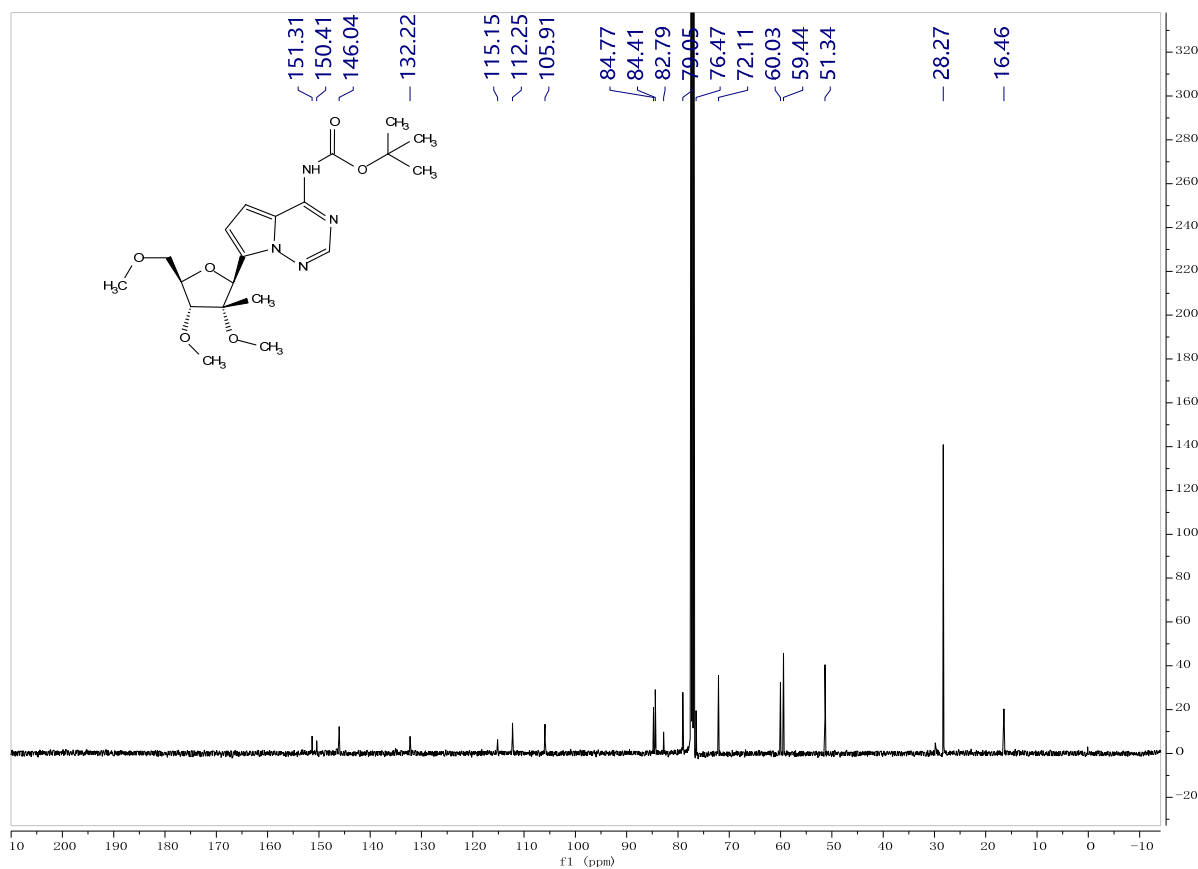

-The End-
